# Supplementary material for: Deconstructing the Polymerase Chain Reaction II: an improved workflow and effects on artifact formation and primer degeneracy
Source: PubMed Central journal article supplement (PMC6573857; doi:10.7717/peerj.7121), 2019-06-14
Supplement: peerj-07-7121-s001.pdf [file peerj-07-7121-s001.pdf]

Supplemental Figure S1A

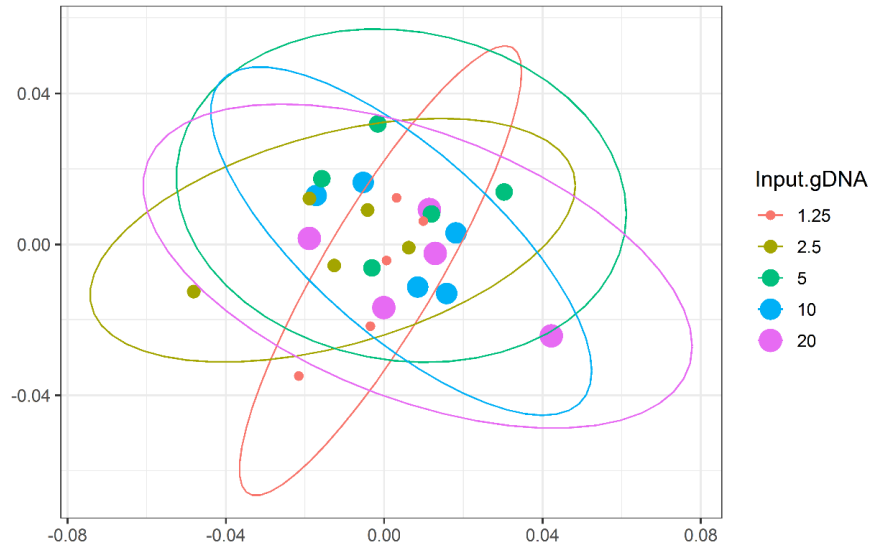

Supplemental Figure S1B

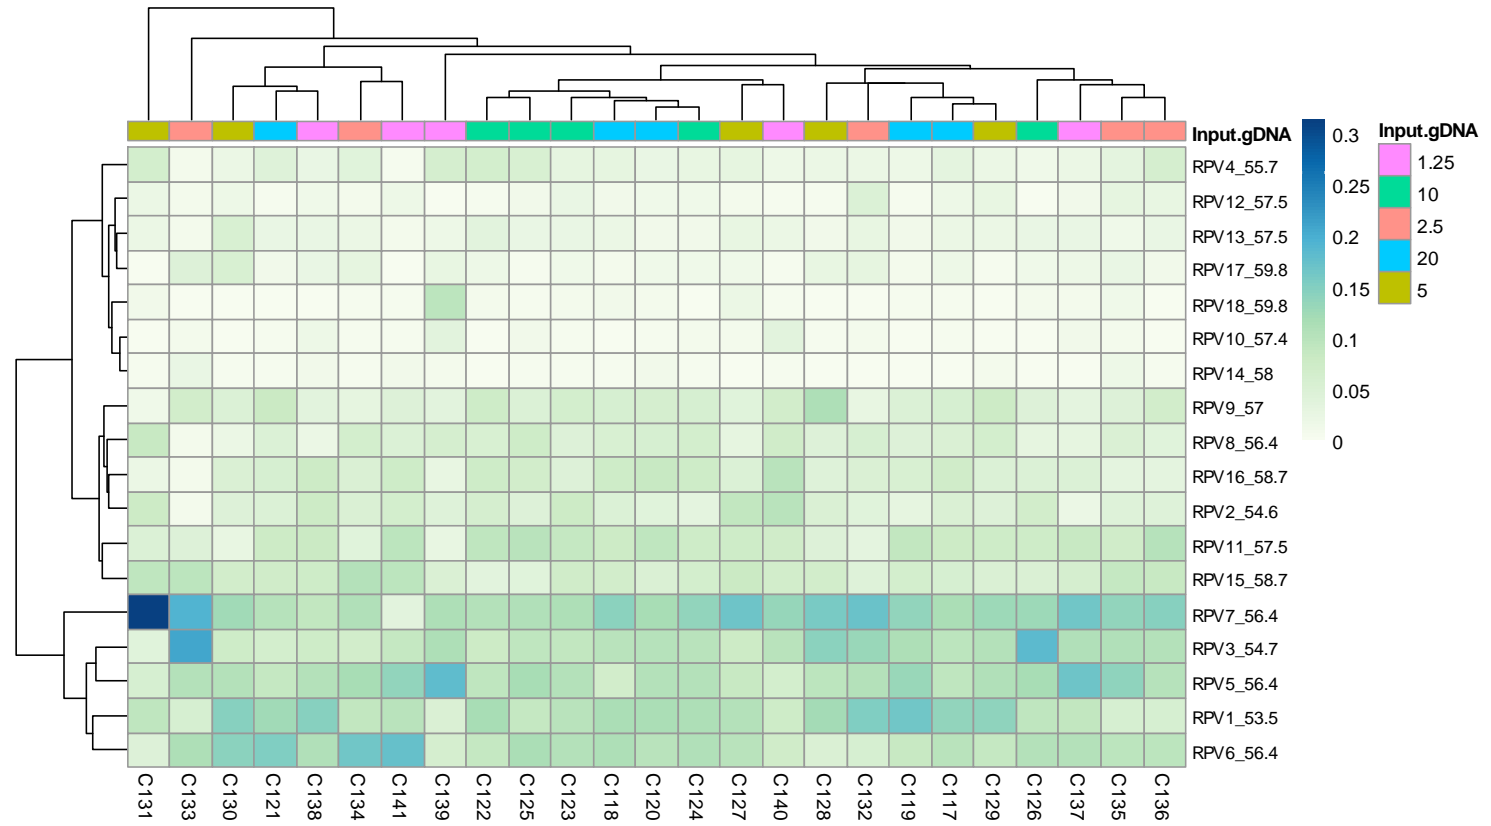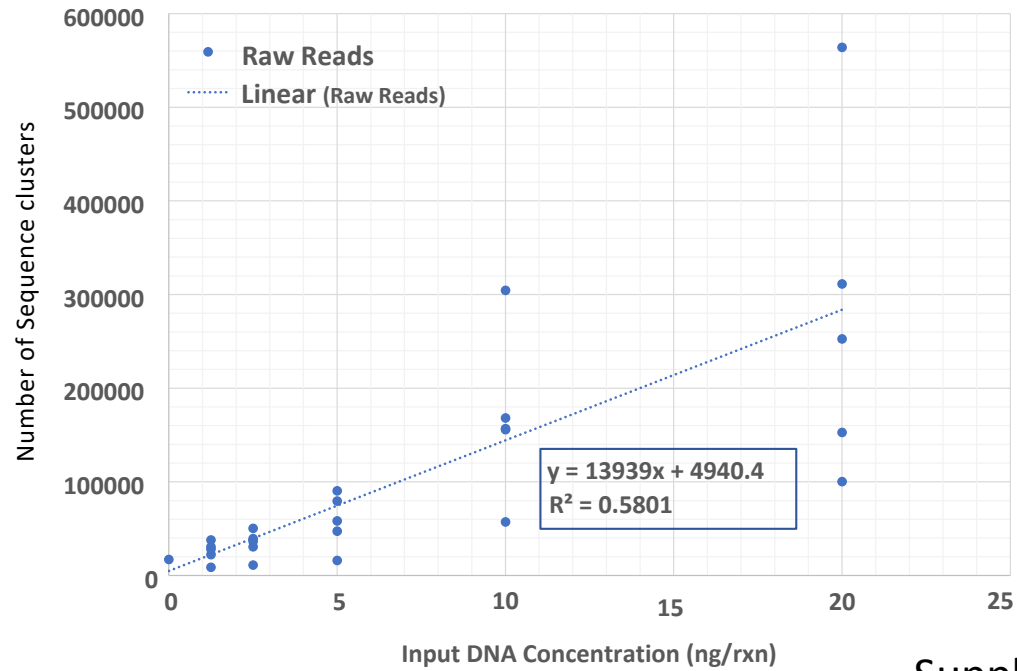

Supplemental Figure S1C
