# Supplementary material for: Deconstructing the Polymerase Chain Reaction II: an improved workflow and effects on artifact formation and primer degeneracy
Source: PeerJ. 2019 Jun 14;7:e7121. doi: 10.7717/peerj.7121 (PMC6573857; doi:10.7717/peerj.7121)
Supplement: Table S1 — TAS = Targeted amplicon sequencing (standard PCR method). For some samples, multiple rarefactions depths were employed performing different comparisons. [file peerj-07-7121-s002.xlsx]

## Sheet: Table S1
Exp	Sample	PCR Method	Primer Variant	Annealing Temp	Barcode Name	Barcode Sequence	Input DNA	gDNA Conc (ng/ul)	Raw Reads	Merged	Trimmed	Post Chimera Removal	Chimeras Removed	Chimera Removed (%)	Shannon (Genus)	Simpson (Genus)	Richness (Genus)	Evenness (Genus)	Rarefaction	Reference Figures / Tables
1	C1.40.S1	TAS	Pool	40	FLD0001	GTATCGTCGT	Chin. Feces	10	103388	101213	87769	82726	5043	0.0574576	2.69678	0.879612	59	0.661374	4500	3, 4, T1, T2
1	C2.40.S2	TAS	Pool	40	FLD0002	GTGTATGCGT	Chin. Feces	10	172406	168166	145598	138284	7314	0.0502342	2.66481	0.873939	62	0.64568	4500	3, 4, T1, T2
1	C3.40.S3	TAS	Pool	40	FLD0003	TGCTCGTAGT	Chin. Feces	10	124807	122221	106435	100786	5649	0.0530746	2.73256	0.885373	60	0.667399	4500	3, 4, T1, T2
1	C4.40.S4	TAS	Pool	40	FLD0004	GTCGTCGTCT	Chin. Feces	10	115690	113027	97821	93034	4787	0.0489363	2.68229	0.875703	64	0.644955	4500	3, 4, T1, T2
1	C5.40.S5	TAS	Pool	40	FLD0005	GTGCGTGTGT	Chin. Feces	10	112168	109502	95164	90554	4610	0.0484427	2.69656	0.877885	61	0.655958	4500	3, 4, T1, T2
1	C7.45.S7	TAS	Pool	45	FLD0007	GTCGTGTACT	Chin. Feces	10	140264	137108	118939	110739	8200	0.0689429	2.67886	0.872481	64	0.644129	4500	3, 4, T1, T2
1	C8.45.S8	TAS	Pool	45	FLD0008	GATGTAGCGT	Chin. Feces	10	149816	146093	126440	118066	8374	0.066229	2.739	0.879693	57	0.677458	4500	3, 4, T1, T2
1	C9.45.S9	TAS	Pool	45	FLD0009	GAGTGATCGT	Chin. Feces	10	135480	132419	115597	108290	7307	0.063211	2.70252	0.879765	61	0.657409	4500	3, 4, T1, T2
1	C10.45.S10	TAS	Pool	45	FLD0010	CGCTATCAGT	Chin. Feces	10	143235	138419	117398	109798	7600	0.064737	2.72909	0.882487	62	0.661255	4500	3, 4, T1, T2
1	C11.45.S11	TAS	Pool	45	FLD0011	CGCTGTAGTC	Chin. Feces	10	131977	127713	109495	102777	6718	0.0613544	2.7326	0.885098	59	0.670159	4500	3, 4, T1, T2
1	C13.50.S13	TAS	Pool	50	FLD0013	GAGCTAGTGA	Chin. Feces	10	103192	100268	86023	80162	5861	0.0681329	2.77212	0.885826	63	0.669088	(4500), [1800]	(3, 4, T1, T2), [5, T3]
1	C14.50.S14	TAS	Pool	50	FLD0014	CGTGCTGTCA	Chin. Feces	10	124293	120456	103252	96391	6861	0.0664491	2.7366	0.879857	60	0.668384	(4500), [1800]	(3, 4, T1, T2), [5, T3]
1	C15.50.S15	TAS	Pool	50	FLD0015	GATCGTCTCT	Chin. Feces	10	122686	119885	103189	96495	6694	0.0648713	2.7087	0.876518	65	0.648885	(4500), [1800]	(3, 4, T1, T2), [5, T3]
1	C16.50.S16	TAS	Pool	50	FLD0016	GTGCTGTCGT	Chin. Feces	10	129109	125996	109380	102335	7045	0.0644085	2.75993	0.883491	65	0.661159	(4500), [1800]	(3, 4, T1, T2), [5, T3]
1	C17.50.S17	TAS	Pool	50	FLD0017	TGAGCGTGCT	Chin. Feces	10	128078	125392	110177	103273	6904	0.0626628	2.72812	0.878121	67	0.648827	(4500), [1800]	(3, 4, T1, T2), [5, T3]
1	C19.55.S19	TAS	Pool	55	FLD0019	TCAGTGTCTC	Chin. Feces	10	134517	131823	114976	108364	6612	0.0575077	2.69102	0.874759	63	0.649512	4500	3, 4, T1, T2
1	C20.55.S20	TAS	Pool	55	FLD0020	GTGCTCATGT	Chin. Feces	10	169782	165945	143739	134636	9103	0.0633301	2.74961	0.883922	62	0.666227	4500	3, 4, T1, T2
1	C21.55.S21	TAS	Pool	55	FLD0021	CGTATCTCGA	Chin. Feces	10	145938	141502	120776	114277	6499	0.0538104	2.70696	0.877227	59	0.663872	4500	3, 4, T1, T2
1	C22.55.S22	TAS	Pool	55	FLD0022	GTCATGCGTC	Chin. Feces	10	137078	133709	115719	109243	6476	0.0559632	2.72749	0.88126	62	0.660867	4500	3, 4, T1, T2
1	C23.55.S23	TAS	Pool	55	FLD0023	CTATGCGATC	Chin. Feces	10	121829	118565	101340	95884	5456	0.0538386	2.74335	0.884173	64	0.659636	4500	3, 4, T1, T2
1	C25.60.S25	TAS	Pool	60	FLD0025	TGTGTGCATG	Chin. Feces	10	144519	141449	122705	115500	7205	0.0587181	2.71589	0.881319	59	0.666062	4500	3, 4, T1, T2
1	C26.60.S26	TAS	Pool	60	FLD0026	GAGTGTCACT	Chin. Feces	10	131595	128331	111540	105606	5934	0.0532006	2.71981	0.88303	58	0.669831	4500	3, 4, T1, T2
1	C27.60.S27	TAS	Pool	60	FLD0027	CTAGTCTCGT	Chin. Feces	10	134892	131539	112464	106098	6366	0.0566048	2.71169	0.879619	59	0.665032	4500	3, 4, T1, T2
1	C28.60.S28	TAS	Pool	60	FLD0028	GAGTGCATCT	Chin. Feces	10	157453	153935	133200	125493	7707	0.0578604	2.74735	0.884544	64	0.660598	4500	3, 4, T1, T2
1	C29.60.S29	TAS	Pool	60	FLD0029	TGCGTAGTCG	Chin. Feces	10	124015	121021	104802	99909	4893	0.046688	2.7226	0.881596	63	0.657136	4500	3, 4, T1, T2
1	C31.40.S31	DePCR	Pool	40	FLD0031	CTGTAGTGCG	Chin. Feces	10	114122	71766	4653	4652	1	0.000214915	2.53247	0.861503	51	0.644096	4500	3, 4, T1, T2
1	C32.40.S32	DePCR	Pool	40	FLD0032	GTGCGCTAGT	Chin. Feces	10	151979	96133	9612	9602	10	0.00104037	2.53839	0.862217	51	0.645602	4500	3, 4, T1, T2
1	C33.40.S33	DePCR	Pool	40	FLD0033	TGTGCTCGCA	Chin. Feces	10	200714	121186	5265	5263	2	0.000379867	2.54493	0.865928	48	0.657399	4500	3, 4, T1, T2
1	C34.40.S34	DePCR	Pool	40	FLD0034	GATGCGAGCT	Chin. Feces	10	127039	81670	8339	8335	4	0.000479674	2.51752	0.861248	50	0.643534	4500	3, 4, T1, T2
1	C35.40.S35	DePCR	Pool	40	FLD0035	CTGTACGTGA	Chin. Feces	10	190573	119628	9367	9364	3	0.000320273	2.60428	0.869438	53	0.655941	4500	3, 4, T1, T2
1	C37.45.S37	DePCR	Pool	45	FLD0037	TGTCGAGTCA	Chin. Feces	10	52927	40428	21314	21294	20	0.00093835	2.5502	0.85325	59	0.625427	4500	3, 4, T1, T2
1	C38.45.S38	DePCR	Pool	45	FLD0038	GTCTACTGTC	Chin. Feces	10	55533	37992	19429	19425	4	0.000205878	2.59998	0.863104	59	0.637634	4500	3, 4, T1, T2
1	C39.45.S39	DePCR	Pool	45	FLD0039	CAGTCAGAGT	Chin. Feces	10	51984	38396	17668	17664	4	0.000226398	2.59663	0.865981	55	0.647968	4500	3, 4, T1, T2
1	C40.45.S40	DePCR	Pool	45	FLD0040	CGCAGTCTAT	Chin. Feces	10	47578	36101	17542	17513	29	0.00165318	2.56221	0.86481	52	0.648455	4500	3, 4, T1, T2
1	C41.45.S41	DePCR	Pool	45	FLD0041	GTATGAGCAC	Chin. Feces	10	59059	46008	21208	21171	37	0.00174462	2.61928	0.866853	61	0.637159	4500	3, 4, T1, T2
1	C43.50.S43	DePCR	Pool	50	FLD0043	TATAGCACGC	Chin. Feces	10	48121	46185	38368	38346	22	0.000573394	2.65569	0.872271	58	0.654039	(4500), [1800]	(3, 4, T1, T2), [5, T3]
1	C44.50.S44	DePCR	Pool	50	FLD0044	TCATGCGCGA	Chin. Feces	10	50657	47927	38755	38732	23	0.000593472	2.6609	0.878144	56	0.661034	(4500), [1800]	(3, 4, T1, T2), [5, T3]
1	C45.50.S45	DePCR	Pool	50	FLD0045	TATGCGCTGC	Chin. Feces	10	42712	40960	34233	34226	7	0.000204481	2.67108	0.872671	59	0.655071	(4500), [1800]	(3, 4, T1, T2), [5, T3]
1	C46.50.S46	DePCR	Pool	50	FLD0046	TCTCTGTGCA	Chin. Feces	10	55328	52123	42270	42254	16	0.000378519	2.67936	0.87237	66	0.639517	(4500), [1800]	(3, 4, T1, T2), [5, T3]
1	C47.50.S47	DePCR	Pool	50	FLD0047	CTATCGCGTG	Chin. Feces	10	47576	44772	36513	36500	13	0.000356038	2.64819	0.869018	59	0.649458	(4500), [1800]	(3, 4, T1, T2), [5, T3]
1	C49.55.S49	DePCR	Pool	55	FLD0049	CTGCATGATC	Chin. Feces	10	73613	71480	61024	60995	29	0.000475223	2.66965	0.874056	59	0.654721	4500	3, 4, T1, T2
1	C50.55.S50	DePCR	Pool	55	FLD0050	CGCGTATCAT	Chin. Feces	10	59831	57618	48634	48594	40	0.00082247	2.62771	0.870706	61	0.63921	4500	3, 4, T1, T2
1	C51.55.S51	DePCR	Pool	55	FLD0051	GTATCTCTCG	Chin. Feces	10	77419	75569	65315	65279	36	0.000551175	2.61498	0.863471	55	0.65255	4500	3, 4, T1, T2
1	C52.55.S52	DePCR	Pool	55	FLD0052	GCTCATATGC	Chin. Feces	10	67895	65982	56098	56084	14	0.000249563	2.6673	0.872843	59	0.654145	4500	3, 4, T1, T2
1	C53.55.S53	DePCR	Pool	55	FLD0053	CACTATGTCG	Chin. Feces	10	56623	54431	45771	45749	22	0.000480654	2.62437	0.869255	59	0.643617	4500	3, 4, T1, T2
1	C55.60.S55	DePCR	Pool	60	FLD0055	CGTCACAGTA	Chin. Feces	10	21333	20566	16972	16970	2	0.000117841	2.65659	0.877711	58	0.654261	4500	3, 4, T1, T2
1	C56.60.S56	DePCR	Pool	60	FLD0056	TCGCGTGAGA	Chin. Feces	10	27482	26666	22530	22521	9	0.000399467	2.63333	0.875204	56	0.654185	4500	3, 4, T1, T2
1	C57.60.S57	DePCR	Pool	60	FLD0057	TACATCGCTG	Chin. Feces	10	22266	21670	18212	18204	8	0.000439271	2.5768	0.864994	58	0.63461	4500	3, 4, T1, T2
1	C58.60.S58	DePCR	Pool	60	FLD0058	GTGAGAGACA	Chin. Feces	10	40704	39657	33921	33909	12	0.000353763	2.65845	0.874103	58	0.65472	4500	3, 4, T1, T2
1	C59.60.S59	DePCR	Pool	60	FLD0059	GACTGTACGT	Chin. Feces	10	25664	24939	21048	21046	2	9.50209e-05	2.64757	0.877177	53	0.666846	4500	3, 4, T1, T2
2	C117_CACAGTGATG	DePCR	Pool	50	FLD0118	CACAGTGATG	Chin. Feces	20	252743	247066	229042	228950	92	0.000401673	2.68995	0.871634	66	0.642047	8000	S1, T1
2	C118_CGAGCTAGCA	DePCR	Pool	50	FLD0119	CGAGCTAGCA	Chin. Feces	20	152773	149474	139195	139172	23	0.000165236	2.68907	0.876563	67	0.639541	8000	S1, T1
2	C119_GAGACTATGC	DePCR	Pool	50	FLD0120	GAGACTATGC	Chin. Feces	20	564011	556769	528053	527730	323	0.000611681	2.64234	0.870124	66	0.630681	8000	S1, T1
2	C120_CAGAGCTAGT	DePCR	Pool	50	FLD0121	CAGAGCTAGT	Chin. Feces	20	311297	305120	285609	285384	225	0.00078779	2.68268	0.873641	68	0.635781	8000	S1, T1
2	C121_CGCAGAGCAT	DePCR	Pool	50	FLD0122	CGCAGAGCAT	Chin. Feces	20	100316	97814	91440	91403	37	0.000404637	2.68739	0.874611	69	0.6347	8000	S1, T1
2	C122_TGTACAGCGA	DePCR	Pool	50	FLD0123	TGTACAGCGA	Chin. Feces	10	155895	154408	144673	144659	14	9.677e-05	2.69282	0.876011	63	0.649947	8000	S1, T1
2	C123_ACGTCAGTAT	DePCR	Pool	50	FLD0124	ACGTCAGTAT	Chin. Feces	10	156965	153013	143410	143300	110	0.000767032	2.69067	0.87742	65	0.644566	8000	S1, T1
2	C124_TCACAGCATA	DePCR	Pool	50	FLD0125	TCACAGCATA	Chin. Feces	10	304500	299555	280936	280803	133	0.000473417	2.66032	0.871903	65	0.637297	8000	S1, T1
2	C125_ACTGCGTGTC	DePCR	Pool	50	FLD0126	ACTGCGTGTC	Chin. Feces	10	168252	165075	154436	154382	54	0.000349659	2.71419	0.878769	66	0.647832	8000	S1, T1
2	C126_CGATCGACTG	DePCR	Pool	50	FLD0127	CGATCGACTG	Chin. Feces	10	57229	55829	52064	52061	3	5.76214e-05	2.65928	0.869225	64	0.639422	8000	S1, T1
2	C127_GCGAGATGTA	DePCR	Pool	50	FLD0128	GCGAGATGTA	Chin. Feces	5	90420	88868	83583	83552	31	0.000370889	2.68934	0.87533	65	0.644248	8000	S1, T1
2	C128_CTGATGCAGA	DePCR	Pool	50	FLD0129	CTGATGCAGA	Chin. Feces	5	47463	46372	42865	42849	16	0.000373265	2.68794	0.876055	63	0.648769	8000	S1, T1
2	C129_GTGACGTACG	DePCR	Pool	50	FLD0130	GTGACGTACG	Chin. Feces	5	79433	78588	73963	73932	31	0.000419128	2.65831	0.871705	62	0.644107	8000	S1, T1
2	C130_CGACGCTGAT	DePCR	Pool	50	FLD0131	CGACGCTGAT	Chin. Feces	5	58366	57004	51664	51654	10	0.000193558	2.68373	0.877681	63	0.647754	8000	S1, T1
2	C131_CTACGATCAG	DePCR	Pool	50	FLD0132	CTACGATCAG	Chin. Feces	5	16138	15778	14339	14339	0	0	2.7043	0.880699	64	0.650248	8000	S1, T1
2	C132_GCACTAGACA	DePCR	Pool	50	FLD0133	GCACTAGACA	Chin. Feces	2.5	30696	30016	27759	27756	3	0.000108073	2.68339	0.874667	62	0.650181	8000	S1, T1
2	C133_CTAGCAGATG	DePCR	Pool	50	FLD0134	CTAGCAGATG	Chin. Feces	2.5	11147	10874	10067	10063	4	0.000397338	2.67786	0.870985	56	0.66525	8000	S1, T1
2	C134_CATGATACGC	DePCR	Pool	50	FLD0135	CATGATACGC	Chin. Feces	2.5	36464	35614	33040	33031	9	0.000272397	2.69259	0.878221	66	0.642677	8000	S1, T1
2	C135_GCAGCTGTCA	DePCR	Pool	50	FLD0136	GCAGCTGTCA	Chin. Feces	2.5	50445	49572	46618	46609	9	0.000193058	2.6751	0.873655	67	0.636219	8000	S1, T1
2	C136_ACGTATCATC	DePCR	Pool	50	FLD0137	ACGTATCATC	Chin. Feces	2.5	39358	38371	35836	35831	5	0.000139525	2.64175	0.874721	60	0.64522	8000	S1, T1
2	C137_AGTATCGTAC	DePCR	Pool	50	FLD0138	AGTATCGTAC	Chin. Feces	1.25	28198	27912	26590	26575	15	0.000564122	2.64197	0.872553	62	0.640145	8000	S1, T1
2	C138_GATACACTGA	DePCR	Pool	50	FLD0139	GATACACTGA	Chin. Feces	1.25	37941	37379	35198	35192	6	0.000170464	2.66031	0.873124	61	0.64714	8000	S1, T1
2	C139_GACTAGTCAG	DePCR	Pool	50	FLD0140	GACTAGTCAG	Chin. Feces	1.25	8852	8681	8106	8105	1	0.000123365	2.64368	0.862985	63	0.638087	8000	S1, T1
2	C140_GATGACTACG	DePCR	Pool	50	FLD0141	GATGACTACG	Chin. Feces	1.25	22351	22118	20909	20907	2	9.56526e-05	2.65207	0.868979	61	0.645136	8000	S1, T1
2	C141_CAGAGAGTCA	DePCR	Pool	50	FLD0142	CAGAGAGTCA	Chin. Feces	1.25	30685	29983	28045	28024	21	0.000748797	2.68225	0.876985	60	0.655111	8000	S1, T1
3	C233_GCCATGTCAT	TAS	RPV1	50	FLD0238	GCCATGTCAT	Chin. Feces	10	25323	24827	22407	19426	2981	0.133039	2.38635	0.838701	47	0.619807	1800	5, T1, T3
3	C234_TCTGCCTATA	TAS	RPV1	50	FLD0239	TCTGCCTATA	Chin. Feces	10	23815	23535	21521	17893	3628	0.16858	2.3845	0.837583	50	0.609532	1800	5, T1, T3
3	C235_CTTAGTTCGC	TAS	RPV2	50	FLD0240	CTTAGTTCGC	Chin. Feces	10	31645	31166	28150	24302	3848	0.136696	2.33199	0.823462	42	0.623915	1800	5, T1, T3
3	C236_CGTAATGAGC	TAS	RPV2	50	FLD0241	CGTAATGAGC	Chin. Feces	10	40115	39306	35073	30544	4529	0.129131	2.34892	0.822246	46	0.613511	1800	5, T1, T3
3	C237_TTGCTTAGTC	TAS	RPV3	50	FLD0242	TTGCTTAGTC	Chin. Feces	10	298471	295760	274907	230709	44198	0.160774	2.51762	0.859531	50	0.643561	1800	5, T1, T3
3	C238_TCTTGTTCAC	TAS	RPV3	50	FLD0243	TCTTGTTCAC	Chin. Feces	10	30498	30240	27952	23660	4292	0.153549	2.33331	0.822102	47	0.606033	1800	5, T1, T3
3	C239_GTGGCTTCGT	TAS	RPV4	50	FLD0244	GTGGCTTCGT	Chin. Feces	10	41374	40961	37803	32460	5343	0.141338	2.22434	0.80271	47	0.577727	1800	5, T1, T3
3	C240_TGTTCGATAG	TAS	RPV4	50	FLD0245	TGTTCGATAG	Chin. Feces	10	25852	25649	24002	21188	2814	0.11724	2.22726	0.801864	45	0.585094	1800	5, T1, T3
3	C241_TCATTCAGTG	TAS	RPV5	50	FLD0246	TCATTCAGTG	Chin. Feces	10	28622	28224	25617	22465	3152	0.123043	2.38695	0.834086	50	0.610157	1800	5, T1, T3
3	C242_GTGGAGAGCT	TAS	RPV5	50	FLD0247	GTGGAGAGCT	Chin. Feces	10	Removed from analysis due to pipetting error.
3	C243_GTAGAAGTGG	TAS	RPV6	50	FLD0248	GTAGAAGTGG	Chin. Feces	10	27757	27410	25169	22423	2746	0.109102	2.48859	0.84878	46	0.649993	1800	5, T1, T3
3	C244_TGGAGCATGT	TAS	RPV6	50	FLD0249	TGGAGCATGT	Chin. Feces	10	38451	38111	35336	28986	6350	0.179703	2.45227	0.842875	51	0.623697	1800	5, T1, T3
3	C245_GAAGGAGATA	TAS	RPV7	50	FLD0250	GAAGGAGATA	Chin. Feces	10	35859	35195	31942	28497	3445	0.107852	2.44906	0.837501	54	0.613955	1800	5, T1, T3
3	C246_CGAATGTATG	TAS	RPV7	50	FLD0251	CGAATGTATG	Chin. Feces	10	36804	36049	32257	27408	4849	0.150324	2.48679	0.852564	51	0.632476	1800	5, T1, T3
3	C247_TCGTGAATGA	TAS	RPV8	50	FLD0252	TCGTGAATGA	Chin. Feces	10	40014	39370	35612	30546	5066	0.142255	2.39353	0.828888	53	0.60286	1800	5, T1, T3
3	C248_GAATAGCTGA	TAS	RPV8	50	FLD0253	GAATAGCTGA	Chin. Feces	10	28376	27873	25128	21327	3801	0.151266	2.41171	0.830422	60	0.589033	1800	5, T1, T3
3	C249_TTGTCACATC	TAS	RPV9	50	FLD0254	TTGTCACATC	Chin. Feces	10	31182	30901	28727	25836	2891	0.100637	2.48253	0.843504	61	0.603893	1800	5, T1, T3
3	C250_CTGGAGGCTA	TAS	RPV9	50	FLD0255	CTGGAGGCTA	Chin. Feces	10	37611	36855	33180	28017	5163	0.155606	2.35033	0.82466	47	0.610451	1800	5, T1, T3
3	C251_TGTCAGCTTA	TAS	RPV10	50	FLD0256	TGTCAGCTTA	Chin. Feces	10	27558	27323	25357	24059	1298	0.051189	2.45467	0.833361	51	0.624309	1800	5, T1, T3
3	C252_GTTCTTCGTA	TAS	RPV10	50	FLD0257	GTTCTTCGTA	Chin. Feces	10	33771	33377	30489	28638	1851	0.0607104	2.49993	0.848579	55	0.623839	1800	5, T1, T3
3	C253_TTACACGTTC	TAS	RPV11	50	FLD0258	TTACACGTTC	Chin. Feces	10	34670	34405	32205	27148	5057	0.157025	2.28212	0.825836	43	0.606754	1800	5, T1, T3
3	C254_GTAGCCAGTA	TAS	RPV11	50	FLD0259	GTAGCCAGTA	Chin. Feces	10	31863	31427	28645	24163	4482	0.156467	2.32588	0.831612	46	0.607496	1800	5, T1, T3
3	C255_TGAGAAGGTA	TAS	RPV12	50	FLD0260	TGAGAAGGTA	Chin. Feces	10	33361	32959	30636	27542	3094	0.100992	2.57374	0.861509	53	0.648249	1800	5, T1, T3
3	C256_CCATATGATC	TAS	RPV12	50	FLD0261	CCATATGATC	Chin. Feces	10	45388	44360	39330	35221	4109	0.104475	2.61052	0.871878	51	0.663946	1800	5, T1, T3
3	C257_CGATCCTATA	TAS	RPV13	50	FLD0262	CGATCCTATA	Chin. Feces	10	30251	29593	26516	23537	2979	0.112347	2.50403	0.857404	47	0.650373	1800	5, T1, T3
3	C258_TGACTAGCTT	TAS	RPV13	50	FLD0263	TGACTAGCTT	Chin. Feces	10	33869	33516	30918	27676	3242	0.104858	2.50802	0.85923	53	0.631697	1800	5, T1, T3
3	C259_TAACTCTGCT	TAS	RPV14	50	FLD0264	TAACTCTGCT	Chin. Feces	10	39100	38714	35657	33801	1856	0.0520515	2.3691	0.818876	52	0.599582	1800	5, T1, T3
3	C260_TCGAATGTGC	TAS	RPV14	50	FLD0265	TCGAATGTGC	Chin. Feces	10	33548	33143	30194	28612	1582	0.0523945	2.39111	0.820459	52	0.605154	1800	5, T1, T3
3	C261_TCGCTGAACA	TAS	RPV15	50	FLD0266	TCGCTGAACA	Chin. Feces	10	Removed from analysis due to pipetting error.
3	C262_GCGTTATTGC	TAS	RPV15	50	FLD0267	GCGTTATTGC	Chin. Feces	10
3	C263_GAACTATCAC	TAS	RPV16	50	FLD0268	GAACTATCAC	Chin. Feces	10	21642	21290	19106	16642	2464	0.128965	2.45203	0.839028	57	0.606479	1800	5, T1, T3
3	C264_TCGAGGTACT	TAS	RPV16	50	FLD0269	TCGAGGTACT	Chin. Feces	10	12922	12782	11723	10063	1660	0.141602	2.35688	0.826542	61	0.573329	1800	5, T1, T3
3	C265_TGCGGATGGT	TAS	RPV17	50	FLD0270	TGCGGATGGT	Chin. Feces	10	26736	26468	24507	21618	2889	0.117885	2.43173	0.839291	52	0.615433	1800	5, T1, T3
3	C266_TTCGAGCTAT	TAS	RPV17	50	FLD0271	TTCGAGCTAT	Chin. Feces	10	25453	25235	23578	21144	2434	0.103232	2.47755	0.846167	57	0.612791	1800	5, T1, T3
3	C267_GGTCTGGTGT	TAS	RPV18	50	FLD0272	GGTCTGGTGT	Chin. Feces	10	32478	32152	29696	26850	2846	0.0958378	2.26397	0.800098	49	0.581724	1800	5, T1, T3
3	C268_CTAAGTCATG	TAS	RPV18	50	FLD0273	CTAAGTCATG	Chin. Feces	10	33815	33187	29612	25621	3991	0.134776	2.26384	0.804555	47	0.587987	1800	5, T1, T3
3	C269_TTGCAGATCA	DePCR	RPV1	50	FLD0274	TTGCAGATCA	Chin. Feces	10	57091	56582	51975	51958	17	0.00032708	2.65346	0.87304	52	0.671552	1800	5, T1, T3
3	C270_CTGCGAATGT	DePCR	RPV1	50	FLD0275	CTGCGAATGT	Chin. Feces	10	43649	42770	38050	38014	36	0.000946124	2.52975	0.863481	47	0.657052	1800	5, T1, T3
3	C271_CTGTTCTAGC	DePCR	RPV2	50	FLD0276	CTGTTCTAGC	Chin. Feces	10	43957	42996	37860	37819	41	0.00108294	2.54386	0.856423	44	0.672234	1800	5, T1, T3
3	C272_CACTTGTGTG	DePCR	RPV2	50	FLD0277	CACTTGTGTG	Chin. Feces	10	44722	43601	38312	38208	104	0.00271455	2.54926	0.85549	47	0.662121	1800	5, T1, T3
3	C273_TGGATGACAT	DePCR	RPV3	50	FLD0278	TGGATGACAT	Chin. Feces	10	64037	63247	58090	58072	18	0.000309864	2.64128	0.871143	49	0.678674	1800	5, T1, T3
3	C274_GATCCTGAGC	DePCR	RPV3	50	FLD0279	GATCCTGAGC	Chin. Feces	10	86323	84606	75864	75838	26	0.000342719	2.66907	0.879793	49	0.685815	1800	5, T1, T3
3	C275_GTCGGTCTGA	DePCR	RPV4	50	FLD0280	GTCGGTCTGA	Chin. Feces	10	41753	41237	37661	37656	5	0.000132763	2.46438	0.845541	47	0.640074	1800	5, T1, T3
3	C276_TGTTACGATC	DePCR	RPV4	50	FLD0281	TGTTACGATC	Chin. Feces	10	55400	54919	50942	50918	24	0.000471124	2.50128	0.853928	48	0.646126	1800	5, T1, T3
3	C277_GTCTTGGCTC	DePCR	RPV5	50	FLD0282	GTCTTGGCTC	Chin. Feces	10	74461	73412	66368	66353	15	0.000226013	2.67263	0.881837	48	0.690387	1800	5, T1, T3
3	C278_GGTCGTGCAT	DePCR	RPV5	50	FLD0283	GGTCGTGCAT	Chin. Feces	10	46200	45428	41269	41232	37	0.000896557	2.60993	0.86076	55	0.651288	1800	5, T1, T3
3	C279_CAGGCTCAGT	DePCR	RPV6	50	FLD0284	CAGGCTCAGT	Chin. Feces	10	60720	59076	52490	52465	25	0.000476281	2.55607	0.86542	45	0.671472	1800	5, T1, T3
3	C280_TAGCTTCACT	DePCR	RPV6	50	FLD0285	TAGCTTCACT	Chin. Feces	10	62842	62241	57602	57590	12	0.000208326	2.60674	0.871307	48	0.673368	1800	5, T1, T3
3	C281_CAGATGTCCT	DePCR	RPV7	50	FLD0286	CAGATGTCCT	Chin. Feces	10	33724	32860	29078	29070	8	0.000275122	2.56071	0.863799	44	0.676686	1800	5, T1, T3
3	C282_TTACGCAGTG	DePCR	RPV7	50	FLD0287	TTACGCAGTG	Chin. Feces	10	59302	58514	53230	53219	11	0.00020665	2.63872	0.869734	51	0.671117	1800	5, T1, T3
3	C283_TTCGTTCCTG	DePCR	RPV8	50	FLD0288	TTCGTTCCTG	Chin. Feces	10	78565	77768	71849	71839	10	0.000139181	2.49498	0.845434	47	0.648022	1800	5, T1, T3
3	C284_CACTGCTTGA	DePCR	RPV8	50	FLD0289	CACTGCTTGA	Chin. Feces	10	88732	85851	74806	74731	75	0.00100259	2.53412	0.859901	45	0.665706	1800	5, T1, T3
3	C285_TCTAGCGTGG	DePCR	RPV9	50	FLD0290	TCTAGCGTGG	Chin. Feces	10	44913	44244	39268	39264	4	0.000101864	2.55602	0.85894	52	0.64689	1800	5, T1, T3
3	C286_GCATAATCGC	DePCR	RPV9	50	FLD0291	GCATAATCGC	Chin. Feces	10	97832	95600	84767	84748	19	0.000224144	2.61426	0.870764	53	0.658454	1800	5, T1, T3
3	C287_GTCGTAACAC	DePCR	RPV10	50	FLD0292	GTCGTAACAC	Chin. Feces	10	8884	8694	6919	6915	4	0.000578118	2.80032	0.875548	53	0.705319	1800	5, T1, T3
3	C288_GAGATTGCTA	DePCR	RPV10	50	FLD0293	GAGATTGCTA	Chin. Feces	10	25158	24762	21135	21056	79	0.00373788	3.70116	0.953881	116	0.778604	1800	5, T1, T3
3	C289_GGACAGATGG	DePCR	RPV11	50	FLD0294	GGACAGATGG	Chin. Feces	10	53963	52979	47319	47288	31	0.000655128	2.47978	0.851975	49	0.637177	1800	5, T1, T3
3	C290_CTTACGTTGC	DePCR	RPV11	50	FLD0295	CTTACGTTGC	Chin. Feces	10	29952	29305	25072	25069	3	0.000119655	2.5272	0.864633	46	0.660076	1800	5, T1, T3
3	C291_GTGTTCGGTC	DePCR	RPV12	50	FLD0296	GTGTTCGGTC	Chin. Feces	10	25585	25247	22488	22457	31	0.00137851	2.65115	0.859352	49	0.681211	1800	5, T1, T3
3	C292_CTCAAGAAGC	DePCR	RPV12	50	FLD0297	CTCAAGAAGC	Chin. Feces	10	23160	22540	19328	19320	8	0.000413907	2.48646	0.844138	43	0.661082	1800	5, T1, T3
3	C293_TCTCGGATAG	DePCR	RPV13	50	FLD0298	TCTCGGATAG	Chin. Feces	10	20172	19756	17331	17329	2	0.0001154	2.61057	0.866615	45	0.685789	1800	5, T1, T3
3	C294_CTCTGGACGA	DePCR	RPV13	50	FLD0299	CTCTGGACGA	Chin. Feces	10	28219	27463	23845	23837	8	0.0003355	2.63642	0.867201	51	0.670534	1800	5, T1, T3
3	C295_CGAGCATTGT	DePCR	RPV14	50	FLD0300	CGAGCATTGT	Chin. Feces	10	3920	3802	3024	3024	0	0	2.36447	0.832403	27	0.71741	1800	5, T1, T3
3	C296_CCAAGAAGAA	DePCR	RPV14	50	FLD0301	CCAAGAAGAA	Chin. Feces	10	9370	8896	7239	7239	0	0	2.37289	0.813112	36	0.662166	1800	5, T1, T3
3	C297_TCCTTGTTCT	DePCR	RPV15	50	FLD0302	TCCTTGTTCT	Chin. Feces	10	2454	2347	1829	1828	1	0.000546747	2.38567	0.852902	25	0.741149	1800	5, T1, T3
3	C298_GTAACGATGT	DePCR	RPV15	50	FLD0303	GTAACGATGT	Chin. Feces	10	71521	70416	63694	63681	13	0.000204101	2.56048	0.869869	46	0.668769	1800	5, T1, T3
3	C299_TGGACTCAGA	DePCR	RPV16	50	FLD0304	TGGACTCAGA	Chin. Feces	10	308400	304388	275824	275695	129	0.00046769	2.57202	0.864732	51	0.654155	1800	5, T1, T3
3	C300_GGCATCATGC	DePCR	RPV16	50	FLD0305	GGCATCATGC	Chin. Feces	10	53742	52692	46580	46555	25	0.000536711	2.60465	0.864559	55	0.64997	1800	5, T1, T3
3	C301_GTATAACGCT	DePCR	RPV17	50	FLD0306	GTATAACGCT	Chin. Feces	10	15551	15256	13276	13275	1	7.53239e-05	2.58038	0.876164	38	0.709367	1800	5, T1, T3
3	C302_GCAGATAAGT	DePCR	RPV17	50	FLD0307	GCAGATAAGT	Chin. Feces	10	19224	18811	16300	16296	4	0.000245399	2.52903	0.848331	47	0.656865	1800	5, T1, T3
3	C303_GTCGGCTCTA	DePCR	RPV18	50	FLD0308	GTCGGCTCTA	Chin. Feces	10	10297	10132	8693	8692	1	0.000115035	2.36711	0.835183	36	0.660556	1800	5, T1, T3
3	C304_TTCGATAGCA	DePCR	RPV18	50	FLD0309	TTCGATAGCA	Chin. Feces	10	9927	9757	8542	8536	6	0.000702412	2.33042	0.813795	40	0.631743	1800	5, T1, T3
