# Supplementary material for: Deconstructing the Polymerase Chain Reaction II: an improved workflow and effects on artifact formation and primer degeneracy
Source: PeerJ. 2019 Jun 14;7:e7121. doi: 10.7717/peerj.7121 (PMC6573857; doi:10.7717/peerj.7121)
Supplement: Table S2 — Group-significance testing was performed on rarefied biological observation matrices (BIOMs) as described in the text. Non-parametric Kruskal-Wallis testing was performed on taxa greater than 1% of the total dataset, and p-values, false-discovery rate (FDR) p-values, and Bonferroni-Hochberg corrected p-values are reported. Analyses were performed at taxonomic levels from phylum to species. (A) Comparison of TAS and DePCR across all annealing temperatures simultaneously; data were rarefied to 4,500 sequences/sample; (B) Comparison of TAS and DePCR at an annealing temperature of 40 °C; data were rarefied to 4,500 sequences/sample; (C) Comparison of TAS and DePCR at an annealing temperature of 45 °C; data were rarefied to 16,000 sequences/sample; (D) Comparison of TAS and DePCR at an annealing temperature of 50 °C; data were rarefied to 34,000 sequences/sample; (E) Comparison of TAS and DePCR at an annealing temperature of 55 °C; data were rarefied to 34,000 sequences/sample; (F) Comparison of TAS and DePCR at an annealing temperature of 60 °C; data were rarefied to 16,000 sequences/sample. [file peerj-07-7121-s003.xlsx]

## Sheet: S2A-All
All Samples (TAS across all temperatures 40-60°C vs DePCR across all temperatures 40-60°C)
Phylum
OTU	Test-Statistic	P	FDR_P	Bonferroni_P	TAS_mean	DePCR_mean
k__Bacteria;p__Firmicutes	34.456	4.3599e-09	2.61594e-08	2.61594e-08	2057.16	2396.24
k__Bacteria;p__Proteobacteria	29.2097	6.49524e-08	1.94857e-07	3.89714e-07	215.52	163.24
k__Bacteria;p__Cyanobacteria	20.3574	6.42431e-06	1.28486e-05	3.85459e-05	151.52	102.12
Unassigned;Other	12.4846	0.000410321	0.000615481	0.00246192	118.6	95.72
k__Bacteria;p__Bacteroidetes	11.4647	0.000709297	0.000851157	0.00425578	1541.48	1385.92
k__Bacteria;p__Tenericutes	0.33897	0.560424	0.560424	1	297.16	293.6
Class
OTU	Test-Statistic	P	FDR_P	Bonferroni_P	TAS_mean	DePCR_mean
k__Bacteria;p__Firmicutes;c__Clostridia	36.4161	1.5938e-09	1.11566e-08	1.11566e-08	2041.4	2363.76
k__Bacteria;p__Cyanobacteria;c__4C0d-2	16.6911	4.39863e-05	0.000153952	0.000307904	148.68	105.12
k__Bacteria;p__Proteobacteria;c__Epsilonproteobacteria	14.8423	0.000116882	0.000272724	0.000818172	87.44	59
k__Bacteria;p__Bacteroidetes;c__Bacteroidia	10.4371	0.00123508	0.00216139	0.00864557	1534.04	1386.56
Unassigned;Other;Other	9.88627	0.00166517	0.00233124	0.0116562	119.84	99.56
k__Bacteria;p__Proteobacteria;c__Alphaproteobacteria	9.34915	0.00223089	0.00260271	0.0156162	109	88.92
k__Bacteria;p__Tenericutes;c__Mollicutes	0.244847	0.620727	0.620727	1	279.48	278.68
Order
OTU	Test-Statistic	P	FDR_P	Bonferroni_P	TAS_mean	DePCR_mean
k__Bacteria;p__Firmicutes;c__Clostridia;o__Clostridiales	35.9544	2.01988e-09	1.81789e-08	1.81789e-08	2040.56	2383.32
k__Bacteria;p__Proteobacteria;c__Alphaproteobacteria;o__RF32	20.7241	5.3044e-06	2.38698e-05	4.77396e-05	86.44	61.72
k__Bacteria;p__Proteobacteria;c__Epsilonproteobacteria;o__Campylobacterales	17.9129	2.31249e-05	6.93748e-05	0.000208124	86.24	59.24
k__Bacteria;p__Cyanobacteria;c__4C0d-2;o__YS2	16.5584	4.71752e-05	0.000106144	0.000424577	147.92	104.08
k__Bacteria;p__Bacteroidetes;c__Bacteroidia;o__Bacteroidales	13.7367	0.000210309	0.000378556	0.00189278	1546.72	1374.96
Unassigned;Other;Other;Other	8.81788	0.00298293	0.00447439	0.0268464	117.56	98.88
k__Bacteria;p__Tenericutes;c__Mollicutes;o__Anaeroplasmatales	6.41354	0.0113253	0.0145611	0.101928	176.04	150.2
k__Bacteria;p__Tenericutes;c__Mollicutes;o__RF39	4.93942	0.0262509	0.0295322	0.236258	100.68	130.72
k__Bacteria;p__Proteobacteria;c__Alphaproteobacteria;o__Sphingomonadales	0	1	1	1	0.04	0.04
Family
OTU	Test-Statistic	P	FDR_P	Bonferroni_P	TAS_mean	DePCR_mean
k__Bacteria;p__Firmicutes;c__Clostridia;o__Clostridiales;f__	30.6906	3.02622e-08	4.84196e-07	4.84196e-07	1070.56	1220.84
k__Bacteria;p__Firmicutes;c__Clostridia;o__Clostridiales;f__Lachnospiraceae	26.0501	3.32671e-07	2.66137e-06	5.32274e-06	180.04	245.24
k__Bacteria;p__Proteobacteria;c__Alphaproteobacteria;o__RF32;f__	24.5106	7.39021e-07	3.94144e-06	1.18243e-05	89.16	62.88
k__Bacteria;p__Proteobacteria;c__Epsilonproteobacteria;o__Campylobacterales;f__Campylobacteraceae	19.2443	1.15012e-05	4.60048e-05	0.000184019	85.8	58.28
k__Bacteria;p__Firmicutes;c__Clostridia;o__Clostridiales;f__Ruminococcaceae	16.1345	5.89998e-05	0.000157397	0.000943997	714.64	834.88
k__Bacteria;p__Bacteroidetes;c__Bacteroidia;o__Bacteroidales;f__S24-7	16.1337	5.9024e-05	0.000157397	0.000944383	909.56	805.64
k__Bacteria;p__Cyanobacteria;c__4C0d-2;o__YS2;f__	14.5476	0.000136666	0.000312379	0.00218666	146.64	107.72
Unassigned;Other;Other;Other;Other	13.4582	0.000243932	0.000487863	0.00390291	120.12	96.92
k__Bacteria;p__Bacteroidetes;c__Bacteroidia;o__Bacteroidales;f__[Odoribacteraceae]	12.6937	0.000366894	0.000652256	0.0058703	59.12	46.32
k__Bacteria;p__Bacteroidetes;c__Bacteroidia;o__Bacteroidales;f__Rikenellaceae	11.6093	0.00065622	0.00104995	0.0104995	52.72	39.56
k__Bacteria;p__Tenericutes;c__Mollicutes;o__Anaeroplasmatales;f__Anaeroplasmataceae	8.19256	0.00420626	0.0061182	0.0673002	182.6	155.76
k__Bacteria;p__Bacteroidetes;c__Bacteroidia;o__Bacteroidales;f__[Paraprevotellaceae]	3.40042	0.0651797	0.0869063	1	76.4	58.6
k__Bacteria;p__Tenericutes;c__Mollicutes;o__RF39;f__	2.23284	0.135105	0.166283	1	104.04	129.92
k__Bacteria;p__Proteobacteria;c__Alphaproteobacteria;o__Sphingomonadales;f__Sphingomonadaceae	2.04167	0.153042	0.174905	1	0	0.08
k__Bacteria;p__Bacteroidetes;c__Bacteroidia;o__Bacteroidales;f__Bacteroidaceae	0.633303	0.426146	0.454556	1	117.56	122.52
k__Bacteria;p__Bacteroidetes;c__Bacteroidia;o__Bacteroidales;f__Prevotellaceae	0.0904601	0.763593	0.763593	1	280.72	258.68
Genus
OTU	Test-Statistic	P	FDR_P	Bonferroni_P	TAS_mean	DePCR_mean
k__Bacteria;p__Firmicutes;c__Clostridia;o__Clostridiales;f__;g__	32.5531	1.15979e-08	1.73968e-07	1.73968e-07	1078.48	1219.12
k__Bacteria;p__Firmicutes;c__Clostridia;o__Clostridiales;f__Lachnospiraceae;g__	24.7784	6.43153e-07	4.82365e-06	9.64729e-06	117.72	163.48
k__Bacteria;p__Proteobacteria;c__Alphaproteobacteria;o__RF32;f__;g__	21.073	4.42105e-06	2.21053e-05	6.63158e-05	88.28	63.28
k__Bacteria;p__Cyanobacteria;c__4C0d-2;o__YS2;f__;g__	20.2719	6.71796e-06	2.51923e-05	0.000100769	152.24	103.36
k__Bacteria;p__Firmicutes;c__Clostridia;o__Clostridiales;f__Ruminococcaceae;g__Ruminococcus	19.8393	8.42338e-06	2.52701e-05	0.000126351	178.36	230.36
k__Bacteria;p__Proteobacteria;c__Epsilonproteobacteria;o__Campylobacterales;f__Campylobacteraceae;g__Campylobacter	18.4847	1.71274e-05	4.28185e-05	0.000256911	86.36	57.68
k__Bacteria;p__Bacteroidetes;c__Bacteroidia;o__Bacteroidales;f__S24-7;g__	13.738	0.000210161	0.000450345	0.00315242	896.44	813.04
Unassigned;Other;Other;Other;Other;Other	12.4054	0.000428103	0.000802693	0.00642154	116.72	94.52
k__Bacteria;p__Firmicutes;c__Clostridia;o__Clostridiales;f__Ruminococcaceae;g__	10.9494	0.000936364	0.00156061	0.0140455	407.12	464.08
k__Bacteria;p__Tenericutes;c__Mollicutes;o__Anaeroplasmatales;f__Anaeroplasmataceae;g__Anaeroplasma	8.75992	0.00307922	0.00461884	0.0461884	183.24	151.88
k__Bacteria;p__Bacteroidetes;c__Bacteroidia;o__Bacteroidales;f__Bacteroidaceae;g__Bacteroides	2.56469	0.109274	0.14901	1	119.12	122.76
k__Bacteria;p__Tenericutes;c__Mollicutes;o__RF39;f__;g__	1.47144	0.225119	0.281399	1	105.52	129.6
k__Bacteria;p__Proteobacteria;c__Alphaproteobacteria;o__Sphingomonadales;f__Sphingomonadaceae;g__Sphingomonas	1	0.317311	0.366128	1	0	0.04
k__Bacteria;p__Firmicutes;c__Clostridia;o__Clostridiales;f__Ruminococcaceae;g__Oscillospira	0.868807	0.351286	0.376378	1	135.12	140.64
k__Bacteria;p__Bacteroidetes;c__Bacteroidia;o__Bacteroidales;f__Prevotellaceae;g__Prevotella	0.0964042	0.756188	0.756188	1	275.52	258.92
Species
OTU	Test-Statistic	P	FDR_P	Bonferroni_P	TAS_mean	DePCR_mean
k__Bacteria;p__Firmicutes;c__Clostridia;o__Clostridiales;f__;g__;s__	33.7776	6.17857e-09	1.05036e-07	1.05036e-07	1059.52	1224.96
k__Bacteria;p__Proteobacteria;c__Alphaproteobacteria;o__RF32;f__;g__;s__	28.0931	1.1562e-07	9.82772e-07	1.96554e-06	92.52	62.56
k__Bacteria;p__Firmicutes;c__Clostridia;o__Clostridiales;f__Lachnospiraceae;g__;s__	23.1745	1.47948e-06	8.38371e-06	2.51511e-05	118.68	163.6
k__Bacteria;p__Proteobacteria;c__Epsilonproteobacteria;o__Campylobacterales;f__Campylobacteraceae;g__Campylobacter;s__	18.1506	2.041e-05	7.59515e-05	0.00034697	84.92	56.6
k__Bacteria;p__Cyanobacteria;c__4C0d-2;o__YS2;f__;g__;s__	17.9787	2.23387e-05	7.59515e-05	0.000379758	152	103.28
k__Bacteria;p__Firmicutes;c__Clostridia;o__Clostridiales;f__Ruminococcaceae;g__Ruminococcus;s__flavefaciens	17.2707	3.24146e-05	9.18415e-05	0.000551049	51.72	65.36
k__Bacteria;p__Bacteroidetes;c__Bacteroidia;o__Bacteroidales;f__S24-7;g__;s__	16.4462	5.00506e-05	0.000121552	0.000850861	909.64	812.84
k__Bacteria;p__Firmicutes;c__Clostridia;o__Clostridiales;f__Ruminococcaceae;g__;s__	15.7539	7.2138e-05	0.000153293	0.00122635	399.4	461
k__Bacteria;p__Firmicutes;c__Clostridia;o__Clostridiales;f__Ruminococcaceae;g__Ruminococcus;s__	14.9944	0.000107829	0.000203678	0.0018331	127.48	170.84
k__Bacteria;p__Tenericutes;c__Mollicutes;o__Anaeroplasmatales;f__Anaeroplasmataceae;g__Anaeroplasma;s__	9.88437	0.00166689	0.00283371	0.0283371	180.84	150.68
Unassigned;Other;Other;Other;Other;Other;Other	9.52716	0.00202453	0.00312882	0.034417	119.92	99.64
k__Bacteria;p__Firmicutes;c__Clostridia;o__Clostridiales;f__Ruminococcaceae;g__Oscillospira;s__	1.31321	0.251815	0.340388	1	134	139.68
k__Bacteria;p__Tenericutes;c__Mollicutes;o__RF39;f__;g__;s__	1.26718	0.260297	0.340388	1	106.08	126.6
k__Bacteria;p__Proteobacteria;c__Alphaproteobacteria;o__Sphingomonadales;f__Sphingomonadaceae;g__Sphingomonas;s__	1	0.317311	0.385306	1	0	0.04
k__Bacteria;p__Bacteroidetes;c__Bacteroidia;o__Bacteroidales;f__Bacteroidaceae;g__Bacteroides;s__	0.397934	0.528158	0.598579	1	115.72	117.28
k__Bacteria;p__Bacteroidetes;c__Bacteroidia;o__Bacteroidales;f__Prevotellaceae;g__Prevotella;s__copri	0.122023	0.72685	0.772278	1	161.76	145.12
k__Bacteria;p__Bacteroidetes;c__Bacteroidia;o__Bacteroidales;f__Prevotellaceae;g__Prevotella;s__	0.079191	0.778397	0.778397	1	118.4	113.36

## Sheet: S2B-40C
Annealing Temperature 40°C (TAS vs DePCR)
Phylum
OTU	Test-Statistic	P	FDR_P	Bonferroni_P	TAS_40_mean	DePCR_40_mean
k__Bacteria;p__Bacteroidetes	6.81818	0.00902344	0.0135352	0.0541406	1532.8	1191.8
k__Bacteria;p__Cyanobacteria	6.81818	0.00902344	0.0135352	0.0541406	121.6	45
k__Bacteria;p__Firmicutes	6.81818	0.00902344	0.0135352	0.0541406	2071.8	2540.4
k__Bacteria;p__Proteobacteria	6.81818	0.00902344	0.0135352	0.0541406	204.4	141.6
k__Bacteria;p__Tenericutes	5.8061	0.0159707	0.0191648	0.0958242	354	414
Unassigned;Other	0.27439	0.600402	0.600402	1	125.6	129.8
Class
OTU	Test-Statistic	P	FDR_P	Bonferroni_P	TAS_40_mean	DePCR_40_mean
k__Bacteria;p__Cyanobacteria;c__4C0d-2	6.85976	0.00881586	0.015791	0.061711	120	45.8
k__Bacteria;p__Firmicutes;c__Clostridia	6.81818	0.00902344	0.015791	0.0631641	2040.4	2479.8
k__Bacteria;p__Proteobacteria;c__Epsilonproteobacteria	6.81818	0.00902344	0.015791	0.0631641	69.8	20.8
k__Bacteria;p__Tenericutes;c__Mollicutes	6.81818	0.00902344	0.015791	0.0631641	351.2	404.4
k__Bacteria;p__Bacteroidetes;c__Bacteroidia	4.81091	0.0282801	0.0395922	0.197961	1494.8	1207.6
k__Bacteria;p__Proteobacteria;c__Alphaproteobacteria	3.5561	0.0593271	0.0692149	0.415289	121.2	103
Unassigned;Other;Other	0.0987805	0.753298	0.753298	1	140.4	136.2
Order
OTU	Test-Statistic	P	FDR_P	Bonferroni_P	TAS_40_mean	DePCR_40_mean
k__Bacteria;p__Firmicutes;c__Clostridia;o__Clostridiales	6.85976	0.00881586	0.0203027	0.0793427	2045.4	2486.2
k__Bacteria;p__Proteobacteria;c__Epsilonproteobacteria;o__Campylobacterales	6.85976	0.00881586	0.0203027	0.0793427	73.8	22.2
k__Bacteria;p__Bacteroidetes;c__Bacteroidia;o__Bacteroidales	6.81818	0.00902344	0.0203027	0.0812109	1517.6	1201.8
k__Bacteria;p__Cyanobacteria;c__4C0d-2;o__YS2	6.81818	0.00902344	0.0203027	0.0812109	124.8	44.4
Unassigned;Other;Other;Other	3.93818	0.0472018	0.0849632	0.424816	120.8	139.2
k__Bacteria;p__Tenericutes;c__Mollicutes;o__RF39	3.15273	0.0758002	0.1137	0.682202	140.4	180.4
k__Bacteria;p__Proteobacteria;c__Alphaproteobacteria;o__RF32	2.80976	0.0936926	0.120462	0.843234	83	69
k__Bacteria;p__Tenericutes;c__Mollicutes;o__Anaeroplasmatales	0.534545	0.464702	0.52279	1	211.6	221.6
k__Bacteria;p__Proteobacteria;c__Alphaproteobacteria;o__Sphingomonadales	nan	nan	1	nan	0	0
Family
OTU	Test-Statistic	P	FDR_P	Bonferroni_P	TAS_40_mean	DePCR_40_mean
k__Bacteria;p__Cyanobacteria;c__4C0d-2;o__YS2;f__	6.90184	0.00861071	0.028875	0.137771	120.4	49.8
k__Bacteria;p__Bacteroidetes;c__Bacteroidia;o__Bacteroidales;f__Prevotellaceae	6.85976	0.00881586	0.028875	0.141054	210.6	77.8
k__Bacteria;p__Bacteroidetes;c__Bacteroidia;o__Bacteroidales;f__[Paraprevotellaceae]	6.85976	0.00881586	0.028875	0.141054	53	19
k__Bacteria;p__Firmicutes;c__Clostridia;o__Clostridiales;f__Ruminococcaceae	6.81818	0.00902344	0.028875	0.144375	771.6	973.6
k__Bacteria;p__Proteobacteria;c__Epsilonproteobacteria;o__Campylobacterales;f__Campylobacteraceae	6.81818	0.00902344	0.028875	0.144375	70.4	23.2
k__Bacteria;p__Firmicutes;c__Clostridia;o__Clostridiales;f__	5.77091	0.0162936	0.0434496	0.260698	1067.6	1226
k__Bacteria;p__Firmicutes;c__Clostridia;o__Clostridiales;f__Lachnospiraceae	3.57791	0.0585526	0.133835	0.936842	160	217.6
k__Bacteria;p__Tenericutes;c__Mollicutes;o__RF39;f__	3.17195	0.0749129	0.134756	1	149.2	180.4
k__Bacteria;p__Bacteroidetes;c__Bacteroidia;o__Bacteroidales;f__[Odoribacteraceae]	3.15273	0.0758002	0.134756	1	54.4	33.2
k__Bacteria;p__Proteobacteria;c__Alphaproteobacteria;o__RF32;f__	2.48466	0.114961	0.156247	1	86.8	71
k__Bacteria;p__Bacteroidetes;c__Bacteroidia;o__Bacteroidales;f__Bacteroidaceae	2.45455	0.117185	0.156247	1	124.4	106
k__Bacteria;p__Bacteroidetes;c__Bacteroidia;o__Bacteroidales;f__S24-7	2.45455	0.117185	0.156247	1	939.2	841.6
k__Bacteria;p__Tenericutes;c__Mollicutes;o__Anaeroplasmatales;f__Anaeroplasmataceae	1.84364	0.174525	0.2148	1	206	224.8
k__Bacteria;p__Proteobacteria;c__Alphaproteobacteria;o__Sphingomonadales;f__Sphingomonadaceae	1	0.317311	0.362641	1	0	0.2
k__Bacteria;p__Bacteroidetes;c__Bacteroidia;o__Bacteroidales;f__Rikenellaceae	0.547826	0.459207	0.489821	1	67.8	62
Unassigned;Other;Other;Other;Other	0.272727	0.601508	0.601508	1	133.6	133.8
Genus
OTU	Test-Statistic	P	FDR_P	Bonferroni_P	TAS_40_mean	DePCR_40_mean
k__Bacteria;p__Bacteroidetes;c__Bacteroidia;o__Bacteroidales;f__Prevotellaceae;g__Prevotella	6.85976	0.00881586	0.0225586	0.132238	213	77.2
k__Bacteria;p__Firmicutes;c__Clostridia;o__Clostridiales;f__Ruminococcaceae;g__	6.85976	0.00881586	0.0225586	0.132238	437.4	535.8
k__Bacteria;p__Proteobacteria;c__Epsilonproteobacteria;o__Campylobacterales;f__Campylobacteraceae;g__Campylobacter	6.85976	0.00881586	0.0225586	0.132238	74.6	23.4
k__Bacteria;p__Cyanobacteria;c__4C0d-2;o__YS2;f__;g__	6.81818	0.00902344	0.0225586	0.135352	129.4	45.2
k__Bacteria;p__Firmicutes;c__Clostridia;o__Clostridiales;f__Ruminococcaceae;g__Ruminococcus	6.81818	0.00902344	0.0225586	0.135352	199.4	304
k__Bacteria;p__Proteobacteria;c__Alphaproteobacteria;o__RF32;f__;g__	6.81818	0.00902344	0.0225586	0.135352	93.6	69.4
k__Bacteria;p__Firmicutes;c__Clostridia;o__Clostridiales;f__;g__	5.77091	0.0162936	0.0349149	0.244404	1064.4	1215.2
k__Bacteria;p__Firmicutes;c__Clostridia;o__Clostridiales;f__Lachnospiraceae;g__	3.93818	0.0472018	0.0786696	0.708027	107.2	139.2
k__Bacteria;p__Tenericutes;c__Mollicutes;o__RF39;f__;g__	3.93818	0.0472018	0.0786696	0.708027	144.6	183.6
k__Bacteria;p__Firmicutes;c__Clostridia;o__Clostridiales;f__Ruminococcaceae;g__Oscillospira	2.51553	0.11273	0.159798	1	123.8	139.8
k__Bacteria;p__Bacteroidetes;c__Bacteroidia;o__Bacteroidales;f__S24-7;g__	2.45455	0.117185	0.159798	1	938	840.6
Unassigned;Other;Other;Other;Other;Other	1.84364	0.174525	0.218157	1	123.2	136.2
k__Bacteria;p__Tenericutes;c__Mollicutes;o__Anaeroplasmatales;f__Anaeroplasmataceae;g__Anaeroplasma	1.32	0.250592	0.289145	1	208	232.8
k__Bacteria;p__Bacteroidetes;c__Bacteroidia;o__Bacteroidales;f__Bacteroidaceae;g__Bacteroides	1.09756	0.294802	0.315859	1	116.8	106.8
k__Bacteria;p__Proteobacteria;c__Alphaproteobacteria;o__Sphingomonadales;f__Sphingomonadaceae;g__Sphingomonas	nan	nan	1	nan	0	0
Species
OTU	Test-Statistic	P	FDR_P	Bonferroni_P	TAS_40_mean	DePCR_40_mean
k__Bacteria;p__Bacteroidetes;c__Bacteroidia;o__Bacteroidales;f__Prevotellaceae;g__Prevotella;s__copri	6.85976	0.00881586	0.0219141	0.14987	128	38
k__Bacteria;p__Cyanobacteria;c__4C0d-2;o__YS2;f__;g__;s__	6.85976	0.00881586	0.0219141	0.14987	116.2	44.2
k__Bacteria;p__Bacteroidetes;c__Bacteroidia;o__Bacteroidales;f__Prevotellaceae;g__Prevotella;s__	6.81818	0.00902344	0.0219141	0.153398	93.6	40.6
k__Bacteria;p__Firmicutes;c__Clostridia;o__Clostridiales;f__;g__;s__	6.81818	0.00902344	0.0219141	0.153398	1043.2	1218.8
k__Bacteria;p__Firmicutes;c__Clostridia;o__Clostridiales;f__Ruminococcaceae;g__;s__	6.81818	0.00902344	0.0219141	0.153398	422	519
k__Bacteria;p__Firmicutes;c__Clostridia;o__Clostridiales;f__Ruminococcaceae;g__Ruminococcus;s__	6.81818	0.00902344	0.0219141	0.153398	148.8	263.6
k__Bacteria;p__Proteobacteria;c__Epsilonproteobacteria;o__Campylobacterales;f__Campylobacteraceae;g__Campylobacter;s__	6.81818	0.00902344	0.0219141	0.153398	68.8	22.2
k__Bacteria;p__Proteobacteria;c__Alphaproteobacteria;o__RF32;f__;g__;s__	5.3122	0.0211767	0.0450004	0.360003	93.6	69.4
k__Bacteria;p__Bacteroidetes;c__Bacteroidia;o__Bacteroidales;f__Bacteroidaceae;g__Bacteroides;s__	3.23106	0.0722541	0.13648	1	120.2	102
k__Bacteria;p__Firmicutes;c__Clostridia;o__Clostridiales;f__Lachnospiraceae;g__;s__	2.88	0.089686	0.152466	1	112.6	140
k__Bacteria;p__Bacteroidetes;c__Bacteroidia;o__Bacteroidales;f__S24-7;g__;s__	2.45455	0.117185	0.181104	1	954.2	849.8
k__Bacteria;p__Tenericutes;c__Mollicutes;o__RF39;f__;g__;s__	1.86626	0.171904	0.243531	1	149.4	175.2
k__Bacteria;p__Tenericutes;c__Mollicutes;o__Anaeroplasmatales;f__Anaeroplasmataceae;g__Anaeroplasma;s__	1.09756	0.294802	0.385306	1	205.2	227
k__Bacteria;p__Proteobacteria;c__Alphaproteobacteria;o__Sphingomonadales;f__Sphingomonadaceae;g__Sphingomonas;s__	1	0.317311	0.385306	1	0	0.2
Unassigned;Other;Other;Other;Other;Other;Other	0.702439	0.401965	0.427088	1	132.6	138.2
k__Bacteria;p__Firmicutes;c__Clostridia;o__Clostridiales;f__Ruminococcaceae;g__Ruminococcus;s__flavefaciens	0.702439	0.401965	0.427088	1	49.2	49
k__Bacteria;p__Firmicutes;c__Clostridia;o__Clostridiales;f__Ruminococcaceae;g__Oscillospira;s__	0.395122	0.529619	0.529619	1	137	143.2

## Sheet: S2C-45C
Annealing Temperature 45°C (TAS vs DePCR)
Phylum
OTU	Test-Statistic	P	FDR_P	Bonferroni_P	TAS_45_mean	DePCR_45_mean
k__Bacteria;p__Proteobacteria	6.85976	0.00881586	0.0135352	0.0528951	836.4	642.6
k__Bacteria;p__Bacteroidetes	6.81818	0.00902344	0.0135352	0.0541406	5296.4	4613
k__Bacteria;p__Cyanobacteria	6.81818	0.00902344	0.0135352	0.0541406	507.2	326.6
k__Bacteria;p__Firmicutes	6.81818	0.00902344	0.0135352	0.0541406	7373.6	8738.4
Unassigned;Other	4.81091	0.0282801	0.0339361	0.169681	450.8	373
k__Bacteria;p__Tenericutes	0.883636	0.347208	0.347208	1	1146.4	1116.6
Class
OTU	Test-Statistic	P	FDR_P	Bonferroni_P	TAS_45_mean	DePCR_45_mean
k__Bacteria;p__Proteobacteria;c__Alphaproteobacteria	6.85976	0.00881586	0.0126328	0.061711	477.6	354.4
Unassigned;Other;Other	6.81818	0.00902344	0.0126328	0.0631641	460.2	372
k__Bacteria;p__Bacteroidetes;c__Bacteroidia	6.81818	0.00902344	0.0126328	0.0631641	5288.6	4629
k__Bacteria;p__Cyanobacteria;c__4C0d-2	6.81818	0.00902344	0.0126328	0.0631641	490.8	326.4
k__Bacteria;p__Firmicutes;c__Clostridia	6.81818	0.00902344	0.0126328	0.0631641	7236.6	8633
k__Bacteria;p__Proteobacteria;c__Epsilonproteobacteria	4.39024	0.0361451	0.0421693	0.253016	270.6	212.4
k__Bacteria;p__Tenericutes;c__Mollicutes	3.93818	0.0472018	0.0472018	0.330412	1161.2	1088
Order
OTU	Test-Statistic	P	FDR_P	Bonferroni_P	TAS_45_mean	DePCR_45_mean
Unassigned;Other;Other;Other	6.81818	0.00902344	0.0144375	0.0721875	453.2	368.8
k__Bacteria;p__Bacteroidetes;c__Bacteroidia;o__Bacteroidales	6.81818	0.00902344	0.0144375	0.0721875	5340.8	4641
k__Bacteria;p__Cyanobacteria;c__4C0d-2;o__YS2	6.81818	0.00902344	0.0144375	0.0721875	484.4	319.4
k__Bacteria;p__Firmicutes;c__Clostridia;o__Clostridiales	6.81818	0.00902344	0.0144375	0.0721875	7277.2	8637
k__Bacteria;p__Proteobacteria;c__Alphaproteobacteria;o__RF32	6.81818	0.00902344	0.0144375	0.0721875	365.6	248
k__Bacteria;p__Proteobacteria;c__Epsilonproteobacteria;o__Campylobacterales	4.03602	0.0445386	0.0593848	0.356309	272	209.4
k__Bacteria;p__Tenericutes;c__Mollicutes;o__Anaeroplasmatales	1.85488	0.173217	0.197962	1	618	592
k__Bacteria;p__Tenericutes;c__Mollicutes;o__RF39	0.0109091	0.916815	0.916815	1	505.8	488.2
Family
OTU	Test-Statistic	P	FDR_P	Bonferroni_P	TAS_45_mean	DePCR_45_mean
Unassigned;Other;Other;Other;Other	6.85976	0.00881586	0.015791	0.123422	465.8	373.2
k__Bacteria;p__Bacteroidetes;c__Bacteroidia;o__Bacteroidales;f__[Paraprevotellaceae]	6.85976	0.00881586	0.015791	0.123422	212.8	112
k__Bacteria;p__Proteobacteria;c__Alphaproteobacteria;o__RF32;f__	6.85976	0.00881586	0.015791	0.123422	376	245.4
k__Bacteria;p__Bacteroidetes;c__Bacteroidia;o__Bacteroidales;f__Prevotellaceae	6.81818	0.00902344	0.015791	0.126328	846	586.6
k__Bacteria;p__Cyanobacteria;c__4C0d-2;o__YS2;f__	6.81818	0.00902344	0.015791	0.126328	503	328.4
k__Bacteria;p__Firmicutes;c__Clostridia;o__Clostridiales;f__	6.81818	0.00902344	0.015791	0.126328	3740.4	4421.2
k__Bacteria;p__Firmicutes;c__Clostridia;o__Clostridiales;f__Lachnospiraceae	6.81818	0.00902344	0.015791	0.126328	571.6	784.8
k__Bacteria;p__Firmicutes;c__Clostridia;o__Clostridiales;f__Ruminococcaceae	6.81818	0.00902344	0.015791	0.126328	2663.6	3228.6
k__Bacteria;p__Bacteroidetes;c__Bacteroidia;o__Bacteroidales;f__S24-7	4.81091	0.0282801	0.0395922	0.395922	3283	3020.6
k__Bacteria;p__Proteobacteria;c__Epsilonproteobacteria;o__Campylobacterales;f__Campylobacteraceae	4.81091	0.0282801	0.0395922	0.395922	273.2	209.6
k__Bacteria;p__Bacteroidetes;c__Bacteroidia;o__Bacteroidales;f__Bacteroidaceae	2.46951	0.116074	0.136716	1	442.4	398.2
k__Bacteria;p__Bacteroidetes;c__Bacteroidia;o__Bacteroidales;f__[Odoribacteraceae]	2.45455	0.117185	0.136716	1	183.2	154.8
k__Bacteria;p__Tenericutes;c__Mollicutes;o__Anaeroplasmatales;f__Anaeroplasmataceae	0.894479	0.344267	0.347208	1	632.2	600.6
k__Bacteria;p__Tenericutes;c__Mollicutes;o__RF39;f__	0.883636	0.347208	0.347208	1	521.8	495.2
Genus
OTU	Test-Statistic	P	FDR_P	Bonferroni_P	TAS_45_mean	DePCR_45_mean
k__Bacteria;p__Bacteroidetes;c__Bacteroidia;o__Bacteroidales;f__[Paraprevotellaceae];g__YRC22	6.85976	0.00881586	0.0150391	0.132238	140.6	69.2
k__Bacteria;p__Proteobacteria;c__Alphaproteobacteria;o__RF32;f__;g__	6.85976	0.00881586	0.0150391	0.132238	369	241.4
Unassigned;Other;Other;Other;Other;Other	6.81818	0.00902344	0.0150391	0.135352	478.6	374.6
k__Bacteria;p__Bacteroidetes;c__Bacteroidia;o__Bacteroidales;f__Prevotellaceae;g__Prevotella	6.81818	0.00902344	0.0150391	0.135352	851.4	594
k__Bacteria;p__Cyanobacteria;c__4C0d-2;o__YS2;f__;g__	6.81818	0.00902344	0.0150391	0.135352	499.2	322
k__Bacteria;p__Firmicutes;c__Clostridia;o__Clostridiales;f__;g__	6.81818	0.00902344	0.0150391	0.135352	3742.2	4404.6
k__Bacteria;p__Firmicutes;c__Clostridia;o__Clostridiales;f__Lachnospiraceae;g__	6.81818	0.00902344	0.0150391	0.135352	369.8	495.6
k__Bacteria;p__Firmicutes;c__Clostridia;o__Clostridiales;f__Ruminococcaceae;g__	6.81818	0.00902344	0.0150391	0.135352	1495.8	1809.2
k__Bacteria;p__Firmicutes;c__Clostridia;o__Clostridiales;f__Ruminococcaceae;g__Ruminococcus	6.81818	0.00902344	0.0150391	0.135352	686.2	830.8
k__Bacteria;p__Bacteroidetes;c__Bacteroidia;o__Bacteroidales;f__S24-7;g__	4.81091	0.0282801	0.0353502	0.424202	3281.8	3016.6
k__Bacteria;p__Firmicutes;c__Clostridia;o__Clostridiales;f__Ruminococcaceae;g__Oscillospira	4.81091	0.0282801	0.0353502	0.424202	486.8	593
k__Bacteria;p__Proteobacteria;c__Epsilonproteobacteria;o__Campylobacterales;f__Campylobacteraceae;g__Campylobacter	4.81091	0.0282801	0.0353502	0.424202	270.8	208.8
k__Bacteria;p__Bacteroidetes;c__Bacteroidia;o__Bacteroidales;f__Bacteroidaceae;g__Bacteroides	2.45455	0.117185	0.135214	1	446.4	401.8
k__Bacteria;p__Tenericutes;c__Mollicutes;o__Anaeroplasmatales;f__Anaeroplasmataceae;g__Anaeroplasma	1.84364	0.174525	0.186991	1	629	597.4
k__Bacteria;p__Tenericutes;c__Mollicutes;o__RF39;f__;g__	0.272727	0.601508	0.601508	1	502	493
Species
OTU	Test-Statistic	P	FDR_P	Bonferroni_P	TAS_45_mean	DePCR_45_mean
Unassigned;Other;Other;Other;Other;Other;Other	6.85976	0.00881586	0.0153398	0.14987	475.2	370.8
k__Bacteria;p__Bacteroidetes;c__Bacteroidia;o__Bacteroidales;f__Prevotellaceae;g__Prevotella;s__	6.85976	0.00881586	0.0153398	0.14987	354	240.6
k__Bacteria;p__Bacteroidetes;c__Bacteroidia;o__Bacteroidales;f__Prevotellaceae;g__Prevotella;s__copri	6.81818	0.00902344	0.0153398	0.153398	500	352.8
k__Bacteria;p__Bacteroidetes;c__Bacteroidia;o__Bacteroidales;f__[Paraprevotellaceae];g__YRC22;s__	6.81818	0.00902344	0.0153398	0.153398	133	68.6
k__Bacteria;p__Cyanobacteria;c__4C0d-2;o__YS2;f__;g__;s__	6.81818	0.00902344	0.0153398	0.153398	501.2	327.4
k__Bacteria;p__Firmicutes;c__Clostridia;o__Clostridiales;f__;g__;s__	6.81818	0.00902344	0.0153398	0.153398	3792.4	4407
k__Bacteria;p__Firmicutes;c__Clostridia;o__Clostridiales;f__Lachnospiraceae;g__;s__	6.81818	0.00902344	0.0153398	0.153398	351	502.6
k__Bacteria;p__Firmicutes;c__Clostridia;o__Clostridiales;f__Ruminococcaceae;g__;s__	6.81818	0.00902344	0.0153398	0.153398	1495.8	1793.6
k__Bacteria;p__Firmicutes;c__Clostridia;o__Clostridiales;f__Ruminococcaceae;g__Ruminococcus;s__	6.81818	0.00902344	0.0153398	0.153398	502.8	582.4
k__Bacteria;p__Proteobacteria;c__Alphaproteobacteria;o__RF32;f__;g__;s__	6.81818	0.00902344	0.0153398	0.153398	370.6	242.2
k__Bacteria;p__Firmicutes;c__Clostridia;o__Clostridiales;f__Ruminococcaceae;g__Oscillospira;s__	5.77091	0.0162936	0.025181	0.276991	486.4	589.2
k__Bacteria;p__Firmicutes;c__Clostridia;o__Clostridiales;f__Ruminococcaceae;g__Ruminococcus;s__flavefaciens	5.3122	0.0211767	0.0300003	0.360003	185.8	249.2
k__Bacteria;p__Bacteroidetes;c__Bacteroidia;o__Bacteroidales;f__S24-7;g__;s__	4.39024	0.0361451	0.0472667	0.614467	3257.4	3032
k__Bacteria;p__Proteobacteria;c__Epsilonproteobacteria;o__Campylobacterales;f__Campylobacteraceae;g__Campylobacter;s__	3.5561	0.0593271	0.07204	1	274.6	209.8
k__Bacteria;p__Bacteroidetes;c__Bacteroidia;o__Bacteroidales;f__Bacteroidaceae;g__Bacteroides;s__	3.15273	0.0758002	0.0859069	1	423.2	389.6
k__Bacteria;p__Tenericutes;c__Mollicutes;o__Anaeroplasmatales;f__Anaeroplasmataceae;g__Anaeroplasma;s__	1.32	0.250592	0.266254	1	628	600.6
k__Bacteria;p__Tenericutes;c__Mollicutes;o__RF39;f__;g__;s__	0.0981818	0.754023	0.754023	1	512.4	489.6

## Sheet: S2D-50C
Annealing Temperature 50°C (TAS vs DePCR)
Phylum
OTU	Test-Statistic	P	FDR_P	Bonferroni_P	TAS_50_mean	DePCR_50_mean
Unassigned;Other	6.81818	0.00902344	0.0108281	0.0541406	892.8	693.4
k__Bacteria;p__Bacteroidetes	6.81818	0.00902344	0.0108281	0.0541406	11263.2	9986.6
k__Bacteria;p__Cyanobacteria	6.81818	0.00902344	0.0108281	0.0541406	1215	830.2
k__Bacteria;p__Firmicutes	6.81818	0.00902344	0.0108281	0.0541406	15639.2	18516
k__Bacteria;p__Proteobacteria	6.81818	0.00902344	0.0108281	0.0541406	1747	1262.4
k__Bacteria;p__Tenericutes	1.84364	0.174525	0.174525	1	2270.2	2118.8
Class
OTU	Test-Statistic	P	FDR_P	Bonferroni_P	TAS_50_mean	DePCR_50_mean
k__Bacteria;p__Cyanobacteria;c__4C0d-2	6.85976	0.00881586	0.0126328	0.061711	1214	826.6
Unassigned;Other;Other	6.81818	0.00902344	0.0126328	0.0631641	881.8	696.6
k__Bacteria;p__Bacteroidetes;c__Bacteroidia	6.81818	0.00902344	0.0126328	0.0631641	11314	10001.6
k__Bacteria;p__Firmicutes;c__Clostridia	6.81818	0.00902344	0.0126328	0.0631641	15485.4	18357
k__Bacteria;p__Proteobacteria;c__Alphaproteobacteria	6.81818	0.00902344	0.0126328	0.0631641	876.8	637.4
k__Bacteria;p__Proteobacteria;c__Epsilonproteobacteria	5.77091	0.0162936	0.0190092	0.114055	645.4	488.6
k__Bacteria;p__Tenericutes;c__Mollicutes	1.84364	0.174525	0.174525	1	2144	2007.2
Order
OTU	Test-Statistic	P	FDR_P	Bonferroni_P	TAS_50_mean	DePCR_50_mean
Unassigned;Other;Other;Other	6.81818	0.00902344	0.00902344	0.0721875	887.2	698
k__Bacteria;p__Bacteroidetes;c__Bacteroidia;o__Bacteroidales	6.81818	0.00902344	0.00902344	0.0721875	11302	10002.6
k__Bacteria;p__Cyanobacteria;c__4C0d-2;o__YS2	6.81818	0.00902344	0.00902344	0.0721875	1184	824.6
k__Bacteria;p__Firmicutes;c__Clostridia;o__Clostridiales	6.81818	0.00902344	0.00902344	0.0721875	15507	18338.4
k__Bacteria;p__Proteobacteria;c__Alphaproteobacteria;o__RF32	6.81818	0.00902344	0.00902344	0.0721875	716.2	457.4
k__Bacteria;p__Proteobacteria;c__Epsilonproteobacteria;o__Campylobacterales	6.81818	0.00902344	0.00902344	0.0721875	649.2	486.4
k__Bacteria;p__Tenericutes;c__Mollicutes;o__Anaeroplasmatales	6.81818	0.00902344	0.00902344	0.0721875	1313.6	993.6
k__Bacteria;p__Tenericutes;c__Mollicutes;o__RF39	6.81818	0.00902344	0.00902344	0.0721875	870.2	1020.6
Family
OTU	Test-Statistic	P	FDR_P	Bonferroni_P	TAS_50_mean	DePCR_50_mean
k__Bacteria;p__Proteobacteria;c__Alphaproteobacteria;o__RF32;f__	6.85976	0.00881586	0.0135352	0.132238	708	449.2
Unassigned;Other;Other;Other;Other	6.81818	0.00902344	0.0135352	0.135352	898.2	697.4
k__Bacteria;p__Bacteroidetes;c__Bacteroidia;o__Bacteroidales;f__S24-7	6.81818	0.00902344	0.0135352	0.135352	6799.4	5453.6
k__Bacteria;p__Bacteroidetes;c__Bacteroidia;o__Bacteroidales;f__[Odoribacteraceae]	6.81818	0.00902344	0.0135352	0.135352	423.8	319.4
k__Bacteria;p__Cyanobacteria;c__4C0d-2;o__YS2;f__	6.81818	0.00902344	0.0135352	0.135352	1201.8	830.4
k__Bacteria;p__Firmicutes;c__Clostridia;o__Clostridiales;f__	6.81818	0.00902344	0.0135352	0.135352	8231.8	9613.2
k__Bacteria;p__Firmicutes;c__Clostridia;o__Clostridiales;f__Lachnospiraceae	6.81818	0.00902344	0.0135352	0.135352	1389.6	2074.2
k__Bacteria;p__Firmicutes;c__Clostridia;o__Clostridiales;f__Ruminococcaceae	6.81818	0.00902344	0.0135352	0.135352	5385.4	6202.4
k__Bacteria;p__Tenericutes;c__Mollicutes;o__Anaeroplasmatales;f__Anaeroplasmataceae	6.81818	0.00902344	0.0135352	0.135352	1295.8	991.6
k__Bacteria;p__Tenericutes;c__Mollicutes;o__RF39;f__	6.81818	0.00902344	0.0135352	0.135352	852	1024.6
k__Bacteria;p__Proteobacteria;c__Epsilonproteobacteria;o__Campylobacterales;f__Campylobacteraceae	5.77091	0.0162936	0.0222186	0.244404	646.6	487.6
k__Bacteria;p__Bacteroidetes;c__Bacteroidia;o__Bacteroidales;f__Rikenellaceae	3.93818	0.0472018	0.0590022	0.708027	361.4	274.6
k__Bacteria;p__Bacteroidetes;c__Bacteroidia;o__Bacteroidales;f__Prevotellaceae	3.15273	0.0758002	0.0874617	1	1971.4	2130.4
k__Bacteria;p__Bacteroidetes;c__Bacteroidia;o__Bacteroidales;f__Bacteroidaceae	1.32	0.250592	0.268491	1	883	946.4
k__Bacteria;p__Bacteroidetes;c__Bacteroidia;o__Bacteroidales;f__[Paraprevotellaceae]	0.272727	0.601508	0.601508	1	536	502.6
Genus
OTU	Test-Statistic	P	FDR_P	Bonferroni_P	TAS_50_mean	DePCR_50_mean
Unassigned;Other;Other;Other;Other;Other	6.85976	0.00881586	0.0123047	0.132238	888.6	688.4
k__Bacteria;p__Bacteroidetes;c__Bacteroidia;o__Bacteroidales;f__S24-7;g__	6.81818	0.00902344	0.0123047	0.135352	6710.4	5453.4
k__Bacteria;p__Cyanobacteria;c__4C0d-2;o__YS2;f__;g__	6.81818	0.00902344	0.0123047	0.135352	1211.2	825
k__Bacteria;p__Firmicutes;c__Clostridia;o__Clostridiales;f__;g__	6.81818	0.00902344	0.0123047	0.135352	8329.8	9608.6
k__Bacteria;p__Firmicutes;c__Clostridia;o__Clostridiales;f__Lachnospiraceae;g__	6.81818	0.00902344	0.0123047	0.135352	913.2	1400
k__Bacteria;p__Firmicutes;c__Clostridia;o__Clostridiales;f__Ruminococcaceae;g__	6.81818	0.00902344	0.0123047	0.135352	2954.6	3363.8
k__Bacteria;p__Firmicutes;c__Clostridia;o__Clostridiales;f__Ruminococcaceae;g__Ruminococcus	6.81818	0.00902344	0.0123047	0.135352	1374.4	1737.4
k__Bacteria;p__Proteobacteria;c__Alphaproteobacteria;o__RF32;f__;g__	6.81818	0.00902344	0.0123047	0.135352	715	451.8
k__Bacteria;p__Proteobacteria;c__Epsilonproteobacteria;o__Campylobacterales;f__Campylobacteraceae;g__Campylobacter	6.81818	0.00902344	0.0123047	0.135352	661	485.8
k__Bacteria;p__Tenericutes;c__Mollicutes;o__Anaeroplasmatales;f__Anaeroplasmataceae;g__Anaeroplasma	6.81818	0.00902344	0.0123047	0.135352	1329	995.8
k__Bacteria;p__Tenericutes;c__Mollicutes;o__RF39;f__;g__	6.81818	0.00902344	0.0123047	0.135352	842.6	1021.4
k__Bacteria;p__Bacteroidetes;c__Bacteroidia;o__Bacteroidales;f__Prevotellaceae;g__Prevotella	2.45455	0.117185	0.135214	1	1955	2127
k__Bacteria;p__Bacteroidetes;c__Bacteroidia;o__Bacteroidales;f__[Paraprevotellaceae];g__YRC22	2.45455	0.117185	0.135214	1	357	304.8
k__Bacteria;p__Bacteroidetes;c__Bacteroidia;o__Bacteroidales;f__Bacteroidaceae;g__Bacteroides	0.534545	0.464702	0.497895	1	895.8	944.8
k__Bacteria;p__Firmicutes;c__Clostridia;o__Clostridiales;f__Ruminococcaceae;g__Oscillospira	0.272727	0.601508	0.601508	1	1020.4	1099.6
Species
OTU	Test-Statistic	P	FDR_P	Bonferroni_P	TAS_50_mean	DePCR_50_mean
k__Bacteria;p__Tenericutes;c__Mollicutes;o__RF39;f__;g__;s__	6.85976	0.00881586	0.0139453	0.14987	847	1020.2
Unassigned;Other;Other;Other;Other;Other;Other	6.81818	0.00902344	0.0139453	0.153398	908.6	690.4
k__Bacteria;p__Bacteroidetes;c__Bacteroidia;o__Bacteroidales;f__S24-7;g__;s__	6.81818	0.00902344	0.0139453	0.153398	6803.2	5449.8
k__Bacteria;p__Cyanobacteria;c__4C0d-2;o__YS2;f__;g__;s__	6.81818	0.00902344	0.0139453	0.153398	1205.8	825.8
k__Bacteria;p__Firmicutes;c__Clostridia;o__Clostridiales;f__;g__;s__	6.81818	0.00902344	0.0139453	0.153398	8274.4	9615.2
k__Bacteria;p__Firmicutes;c__Clostridia;o__Clostridiales;f__Lachnospiraceae;g__;s__	6.81818	0.00902344	0.0139453	0.153398	881.6	1404
k__Bacteria;p__Firmicutes;c__Clostridia;o__Clostridiales;f__Ruminococcaceae;g__;s__	6.81818	0.00902344	0.0139453	0.153398	3006.8	3352.8
k__Bacteria;p__Firmicutes;c__Clostridia;o__Clostridiales;f__Ruminococcaceae;g__Ruminococcus;s__	6.81818	0.00902344	0.0139453	0.153398	951.8	1128.2
k__Bacteria;p__Firmicutes;c__Clostridia;o__Clostridiales;f__Ruminococcaceae;g__Ruminococcus;s__flavefaciens	6.81818	0.00902344	0.0139453	0.153398	422.6	605.6
k__Bacteria;p__Proteobacteria;c__Alphaproteobacteria;o__RF32;f__;g__;s__	6.81818	0.00902344	0.0139453	0.153398	692.8	452
k__Bacteria;p__Tenericutes;c__Mollicutes;o__Anaeroplasmatales;f__Anaeroplasmataceae;g__Anaeroplasma;s__	6.81818	0.00902344	0.0139453	0.153398	1306.2	994.6
k__Bacteria;p__Proteobacteria;c__Epsilonproteobacteria;o__Campylobacterales;f__Campylobacteraceae;g__Campylobacter;s__	5.77091	0.0162936	0.0230826	0.276991	633.6	483.4
k__Bacteria;p__Bacteroidetes;c__Bacteroidia;o__Bacteroidales;f__Prevotellaceae;g__Prevotella;s__	4.81091	0.0282801	0.0369817	0.480762	805.8	929
k__Bacteria;p__Bacteroidetes;c__Bacteroidia;o__Bacteroidales;f__[Paraprevotellaceae];g__YRC22;s__	2.45455	0.117185	0.142296	1	349.8	305.8
k__Bacteria;p__Bacteroidetes;c__Bacteroidia;o__Bacteroidales;f__Bacteroidaceae;g__Bacteroides;s__	1.32	0.250592	0.284004	1	867.4	908.8
k__Bacteria;p__Firmicutes;c__Clostridia;o__Clostridiales;f__Ruminococcaceae;g__Oscillospira;s__	0.883636	0.347208	0.368908	1	1020.8	1107.8
k__Bacteria;p__Bacteroidetes;c__Bacteroidia;o__Bacteroidales;f__Prevotellaceae;g__Prevotella;s__copri	0.0109091	0.916815	0.916815	1	1153.4	1202.2

## Sheet: S2E-55C
Annealing Temperature 55°C (TAS vs DePCR)
Phylum
OTU	Test-Statistic	P	FDR_P	Bonferroni_P	TAS_55_mean	DePCR_55_mean
Unassigned;Other	6.81818	0.00902344	0.0180469	0.0541406	816	575.4
k__Bacteria;p__Firmicutes	6.81818	0.00902344	0.0180469	0.0541406	15759.8	17471.2
k__Bacteria;p__Proteobacteria	6.81818	0.00902344	0.0180469	0.0541406	1668.6	1271.8
k__Bacteria;p__Cyanobacteria	5.77091	0.0162936	0.0244404	0.0977616	1108	996.4
k__Bacteria;p__Tenericutes	2.45455	0.117185	0.140622	0.703111	2074.2	1877
k__Bacteria;p__Bacteroidetes	1.84364	0.174525	0.174525	1	11717.6	11252.8
Class
OTU	Test-Statistic	P	FDR_P	Bonferroni_P	TAS_55_mean	DePCR_55_mean
Unassigned;Other;Other	6.81818	0.00902344	0.015791	0.0631641	801	572.8
k__Bacteria;p__Firmicutes;c__Clostridia	6.81818	0.00902344	0.015791	0.0631641	15686.6	17375
k__Bacteria;p__Proteobacteria;c__Alphaproteobacteria	6.81818	0.00902344	0.015791	0.0631641	752	594
k__Bacteria;p__Proteobacteria;c__Epsilonproteobacteria	6.81818	0.00902344	0.015791	0.0631641	740.4	539.4
k__Bacteria;p__Cyanobacteria;c__4C0d-2	5.77091	0.0162936	0.022811	0.114055	1126.2	993.6
k__Bacteria;p__Bacteroidetes;c__Bacteroidia	2.45455	0.117185	0.117185	0.820296	11655	11219.2
k__Bacteria;p__Tenericutes;c__Mollicutes	2.45455	0.117185	0.117185	0.820296	1951.4	1771
Order
OTU	Test-Statistic	P	FDR_P	Bonferroni_P	TAS_55_mean	DePCR_55_mean
k__Bacteria;p__Proteobacteria;c__Epsilonproteobacteria;o__Campylobacterales	6.85976	0.00881586	0.0103125	0.0705269	736	539.4
Unassigned;Other;Other;Other	6.81818	0.00902344	0.0103125	0.0721875	812.8	586.4
k__Bacteria;p__Cyanobacteria;c__4C0d-2;o__YS2	6.81818	0.00902344	0.0103125	0.0721875	1121.6	983.2
k__Bacteria;p__Firmicutes;c__Clostridia;o__Clostridiales	6.81818	0.00902344	0.0103125	0.0721875	15640	17383.6
k__Bacteria;p__Proteobacteria;c__Alphaproteobacteria;o__RF32	6.81818	0.00902344	0.0103125	0.0721875	607.2	455.2
k__Bacteria;p__Tenericutes;c__Mollicutes;o__Anaeroplasmatales	6.81818	0.00902344	0.0103125	0.0721875	1305.6	884.6
k__Bacteria;p__Tenericutes;c__Mollicutes;o__RF39	6.81818	0.00902344	0.0103125	0.0721875	642.2	881.8
k__Bacteria;p__Bacteroidetes;c__Bacteroidia;o__Bacteroidales	2.45455	0.117185	0.117185	0.937481	11702.8	11240.4
Family
OTU	Test-Statistic	P	FDR_P	Bonferroni_P	TAS_55_mean	DePCR_55_mean
Unassigned;Other;Other;Other;Other	6.85976	0.00881586	0.0150391	0.132238	815.8	589.8
k__Bacteria;p__Bacteroidetes;c__Bacteroidia;o__Bacteroidales;f__Rikenellaceae	6.85976	0.00881586	0.0150391	0.132238	343.2	232.2
k__Bacteria;p__Bacteroidetes;c__Bacteroidia;o__Bacteroidales;f__Prevotellaceae	6.81818	0.00902344	0.0150391	0.135352	2278	2787.8
k__Bacteria;p__Cyanobacteria;c__4C0d-2;o__YS2;f__	6.81818	0.00902344	0.0150391	0.135352	1135.8	984.6
k__Bacteria;p__Firmicutes;c__Clostridia;o__Clostridiales;f__	6.81818	0.00902344	0.0150391	0.135352	8358.6	9304.8
k__Bacteria;p__Firmicutes;c__Clostridia;o__Clostridiales;f__Lachnospiraceae	6.81818	0.00902344	0.0150391	0.135352	1478.6	2067
k__Bacteria;p__Proteobacteria;c__Alphaproteobacteria;o__RF32;f__	6.81818	0.00902344	0.0150391	0.135352	597.4	457.8
k__Bacteria;p__Proteobacteria;c__Epsilonproteobacteria;o__Campylobacterales;f__Campylobacteraceae	6.81818	0.00902344	0.0150391	0.135352	735	546.2
k__Bacteria;p__Tenericutes;c__Mollicutes;o__RF39;f__	6.81818	0.00902344	0.0150391	0.135352	648	876.8
k__Bacteria;p__Tenericutes;c__Mollicutes;o__Anaeroplasmatales;f__Anaeroplasmataceae	5.8061	0.0159707	0.0222186	0.23956	1338.8	881.2
k__Bacteria;p__Bacteroidetes;c__Bacteroidia;o__Bacteroidales;f__S24-7	5.77091	0.0162936	0.0222186	0.244404	6736.2	5784.2
k__Bacteria;p__Bacteroidetes;c__Bacteroidia;o__Bacteroidales;f__Bacteroidaceae	3.93818	0.0472018	0.0590022	0.708027	881.2	962.8
k__Bacteria;p__Firmicutes;c__Clostridia;o__Clostridiales;f__Ruminococcaceae	3.5561	0.0593271	0.0684543	0.889906	5324.8	5564.2
k__Bacteria;p__Bacteroidetes;c__Bacteroidia;o__Bacteroidales;f__[Odoribacteraceae]	0.534545	0.464702	0.464702	1	453.4	432.4
k__Bacteria;p__Bacteroidetes;c__Bacteroidia;o__Bacteroidales;f__[Paraprevotellaceae]	0.534545	0.464702	0.464702	1	633.6	644.6
Genus
OTU	Test-Statistic	P	FDR_P	Bonferroni_P	TAS_55_mean	DePCR_55_mean
k__Bacteria;p__Proteobacteria;c__Alphaproteobacteria;o__RF32;f__;g__	6.85976	0.00881586	0.0169189	0.132238	610.4	443
Unassigned;Other;Other;Other;Other;Other	6.81818	0.00902344	0.0169189	0.135352	819.4	574.8
k__Bacteria;p__Bacteroidetes;c__Bacteroidia;o__Bacteroidales;f__Prevotellaceae;g__Prevotella	6.81818	0.00902344	0.0169189	0.135352	2316.6	2825.4
k__Bacteria;p__Firmicutes;c__Clostridia;o__Clostridiales;f__;g__	6.81818	0.00902344	0.0169189	0.135352	8394.6	9287.6
k__Bacteria;p__Firmicutes;c__Clostridia;o__Clostridiales;f__Lachnospiraceae;g__	6.81818	0.00902344	0.0169189	0.135352	983.6	1426
k__Bacteria;p__Firmicutes;c__Clostridia;o__Clostridiales;f__Ruminococcaceae;g__Ruminococcus	6.81818	0.00902344	0.0169189	0.135352	1331	1548.2
k__Bacteria;p__Proteobacteria;c__Epsilonproteobacteria;o__Campylobacterales;f__Campylobacteraceae;g__Campylobacter	6.81818	0.00902344	0.0169189	0.135352	734.6	535.2
k__Bacteria;p__Tenericutes;c__Mollicutes;o__RF39;f__;g__	6.81818	0.00902344	0.0169189	0.135352	631.2	875.8
k__Bacteria;p__Bacteroidetes;c__Bacteroidia;o__Bacteroidales;f__S24-7;g__	5.77091	0.0162936	0.0244404	0.244404	6711.2	5778.4
k__Bacteria;p__Tenericutes;c__Mollicutes;o__Anaeroplasmatales;f__Anaeroplasmataceae;g__Anaeroplasma	5.77091	0.0162936	0.0244404	0.244404	1292.4	892
k__Bacteria;p__Bacteroidetes;c__Bacteroidia;o__Bacteroidales;f__Bacteroidaceae;g__Bacteroides	4.39024	0.0361451	0.0492888	0.542177	881.8	976.2
k__Bacteria;p__Cyanobacteria;c__4C0d-2;o__YS2;f__;g__	3.93818	0.0472018	0.0590022	0.708027	1126.2	986.2
k__Bacteria;p__Bacteroidetes;c__Bacteroidia;o__Bacteroidales;f__[Paraprevotellaceae];g__YRC22	1.84364	0.174525	0.201375	1	428.4	382.2
k__Bacteria;p__Firmicutes;c__Clostridia;o__Clostridiales;f__Ruminococcaceae;g__Oscillospira	1.58049	0.20869	0.223597	1	970	1002
k__Bacteria;p__Firmicutes;c__Clostridia;o__Clostridiales;f__Ruminococcaceae;g__	0.0109091	0.916815	0.916815	1	2988.8	2977.8
Species
OTU	Test-Statistic	P	FDR_P	Bonferroni_P	TAS_55_mean	DePCR_55_mean
Unassigned;Other;Other;Other;Other;Other;Other	6.81818	0.00902344	0.0153398	0.153398	786.8	582.2
k__Bacteria;p__Bacteroidetes;c__Bacteroidia;o__Bacteroidales;f__Prevotellaceae;g__Prevotella;s__	6.81818	0.00902344	0.0153398	0.153398	962.6	1268
k__Bacteria;p__Cyanobacteria;c__4C0d-2;o__YS2;f__;g__;s__	6.81818	0.00902344	0.0153398	0.153398	1143.2	989.8
k__Bacteria;p__Firmicutes;c__Clostridia;o__Clostridiales;f__;g__;s__	6.81818	0.00902344	0.0153398	0.153398	8359.4	9271.8
k__Bacteria;p__Firmicutes;c__Clostridia;o__Clostridiales;f__Lachnospiraceae;g__;s__	6.81818	0.00902344	0.0153398	0.153398	976	1439
k__Bacteria;p__Firmicutes;c__Clostridia;o__Clostridiales;f__Ruminococcaceae;g__Ruminococcus;s__	6.81818	0.00902344	0.0153398	0.153398	887.6	1102.8
k__Bacteria;p__Proteobacteria;c__Alphaproteobacteria;o__RF32;f__;g__;s__	6.81818	0.00902344	0.0153398	0.153398	611.6	471
k__Bacteria;p__Proteobacteria;c__Epsilonproteobacteria;o__Campylobacterales;f__Campylobacteraceae;g__Campylobacter;s__	6.81818	0.00902344	0.0153398	0.153398	739.8	544.8
k__Bacteria;p__Tenericutes;c__Mollicutes;o__Anaeroplasmatales;f__Anaeroplasmataceae;g__Anaeroplasma;s__	6.81818	0.00902344	0.0153398	0.153398	1318.4	889.2
k__Bacteria;p__Tenericutes;c__Mollicutes;o__RF39;f__;g__;s__	6.81818	0.00902344	0.0153398	0.153398	637.2	901.6
k__Bacteria;p__Firmicutes;c__Clostridia;o__Clostridiales;f__Ruminococcaceae;g__Ruminococcus;s__flavefaciens	5.8061	0.0159707	0.021307	0.271502	436.4	484
k__Bacteria;p__Bacteroidetes;c__Bacteroidia;o__Bacteroidales;f__Prevotellaceae;g__Prevotella;s__copri	5.77091	0.0162936	0.021307	0.276991	1319	1501
k__Bacteria;p__Bacteroidetes;c__Bacteroidia;o__Bacteroidales;f__S24-7;g__;s__	5.77091	0.0162936	0.021307	0.276991	6719	5791.8
k__Bacteria;p__Bacteroidetes;c__Bacteroidia;o__Bacteroidales;f__[Paraprevotellaceae];g__YRC22;s__	3.5561	0.0593271	0.07204	1	422.2	371.4
k__Bacteria;p__Bacteroidetes;c__Bacteroidia;o__Bacteroidales;f__Bacteroidaceae;g__Bacteroides;s__	1.84364	0.174525	0.197795	1	871	915.6
k__Bacteria;p__Firmicutes;c__Clostridia;o__Clostridiales;f__Ruminococcaceae;g__Oscillospira;s__	0.883636	0.347208	0.368908	1	963	997.2
k__Bacteria;p__Firmicutes;c__Clostridia;o__Clostridiales;f__Ruminococcaceae;g__;s__	0.534545	0.464702	0.464702	1	2998.4	2963.8

## Sheet: S2F-60C
Annealing Temperature 60°C (TAS vs DePCR)
Phylum
OTU	Test-Statistic	P	FDR_P	Bonferroni_P	TAS_60_mean	DePCR_60_mean
Unassigned;Other	6.81818	0.00902344	0.0180469	0.0541406	365	289
k__Bacteria;p__Firmicutes	6.81818	0.00902344	0.0180469	0.0541406	7146	7835
k__Bacteria;p__Proteobacteria	6.81818	0.00902344	0.0180469	0.0541406	754.2	552.6
k__Bacteria;p__Cyanobacteria	4.81091	0.0282801	0.0424202	0.169681	631.6	509.6
k__Bacteria;p__Tenericutes	0.883636	0.347208	0.416649	1	763.4	751.4
k__Bacteria;p__Bacteroidetes	0.272727	0.601508	0.601508	1	5768.6	5824.4
Class
OTU	Test-Statistic	P	FDR_P	Bonferroni_P	TAS_60_mean	DePCR_60_mean
Unassigned;Other;Other	6.85976	0.00881586	0.015791	0.061711	375.8	295.2
k__Bacteria;p__Cyanobacteria;c__4C0d-2	6.81818	0.00902344	0.015791	0.0631641	634.8	490.4
k__Bacteria;p__Firmicutes;c__Clostridia	6.81818	0.00902344	0.015791	0.0631641	7120	7801.6
k__Bacteria;p__Proteobacteria;c__Alphaproteobacteria	6.81818	0.00902344	0.015791	0.0631641	311.2	244
k__Bacteria;p__Proteobacteria;c__Epsilonproteobacteria	4.81091	0.0282801	0.0395922	0.197961	341.2	271.4
k__Bacteria;p__Bacteroidetes;c__Bacteroidia	0.534545	0.464702	0.464702	1	5762.6	5831.6
k__Bacteria;p__Tenericutes;c__Mollicutes	0.534545	0.464702	0.464702	1	710	691.2
Order
OTU	Test-Statistic	P	FDR_P	Bonferroni_P	TAS_60_mean	DePCR_60_mean
Unassigned;Other;Other;Other	6.81818	0.00902344	0.0120313	0.0721875	362.8	293
k__Bacteria;p__Cyanobacteria;c__4C0d-2;o__YS2	6.81818	0.00902344	0.0120313	0.0721875	655.8	513.2
k__Bacteria;p__Firmicutes;c__Clostridia;o__Clostridiales	6.81818	0.00902344	0.0120313	0.0721875	7121.8	7782.8
k__Bacteria;p__Proteobacteria;c__Alphaproteobacteria;o__RF32	6.81818	0.00902344	0.0120313	0.0721875	259	203.2
k__Bacteria;p__Tenericutes;c__Mollicutes;o__Anaeroplasmatales	6.81818	0.00902344	0.0120313	0.0721875	582	411.2
k__Bacteria;p__Tenericutes;c__Mollicutes;o__RF39	6.81818	0.00902344	0.0120313	0.0721875	101.6	283.6
k__Bacteria;p__Proteobacteria;c__Epsilonproteobacteria;o__Campylobacterales	5.8061	0.0159707	0.0182522	0.127766	333.6	261
k__Bacteria;p__Bacteroidetes;c__Bacteroidia;o__Bacteroidales	0.272727	0.601508	0.601508	1	5778	5840.4
Family
OTU	Test-Statistic	P	FDR_P	Bonferroni_P	TAS_60_mean	DePCR_60_mean
k__Bacteria;p__Tenericutes;c__Mollicutes;o__RF39;f__	6.85976	0.00881586	0.0252656	0.123422	104.4	289.2
Unassigned;Other;Other;Other;Other	6.81818	0.00902344	0.0252656	0.126328	367.2	291.6
k__Bacteria;p__Firmicutes;c__Clostridia;o__Clostridiales;f__Lachnospiraceae	6.81818	0.00902344	0.0252656	0.126328	707.8	874.8
k__Bacteria;p__Firmicutes;c__Clostridia;o__Clostridiales;f__Ruminococcaceae	6.81818	0.00902344	0.0252656	0.126328	2337.4	2576.6
k__Bacteria;p__Tenericutes;c__Mollicutes;o__Anaeroplasmatales;f__Anaeroplasmataceae	6.81818	0.00902344	0.0252656	0.126328	582.6	417.2
k__Bacteria;p__Cyanobacteria;c__4C0d-2;o__YS2;f__	5.77091	0.0162936	0.0325872	0.22811	640.4	510.2
k__Bacteria;p__Proteobacteria;c__Alphaproteobacteria;o__RF32;f__	5.77091	0.0162936	0.0325872	0.22811	269.2	198.6
k__Bacteria;p__Firmicutes;c__Clostridia;o__Clostridiales;f__	4.81091	0.0282801	0.0494902	0.395922	3790.8	4107.4
k__Bacteria;p__Proteobacteria;c__Epsilonproteobacteria;o__Campylobacterales;f__Campylobacteraceae	3.15273	0.0758002	0.117911	1	328.8	270.2
k__Bacteria;p__Bacteroidetes;c__Bacteroidia;o__Bacteroidales;f__[Paraprevotellaceae]	2.80976	0.0936926	0.13117	1	420.4	356
k__Bacteria;p__Bacteroidetes;c__Bacteroidia;o__Bacteroidales;f__Bacteroidaceae	2.45455	0.117185	0.136716	1	424	472.4
k__Bacteria;p__Bacteroidetes;c__Bacteroidia;o__Bacteroidales;f__Prevotellaceae	2.45455	0.117185	0.136716	1	1323.6	1404.2
k__Bacteria;p__Bacteroidetes;c__Bacteroidia;o__Bacteroidales;f__S24-7	0.534545	0.464702	0.464702	1	3118.4	3073.6
k__Bacteria;p__Bacteroidetes;c__Bacteroidia;o__Bacteroidales;f__[Odoribacteraceae]	0.534545	0.464702	0.464702	1	206.4	213.4
Genus
OTU	Test-Statistic	P	FDR_P	Bonferroni_P	TAS_60_mean	DePCR_60_mean
k__Bacteria;p__Tenericutes;c__Mollicutes;o__RF39;f__;g__	6.85976	0.00881586	0.0150391	0.132238	111.6	283.6
Unassigned;Other;Other;Other;Other;Other	6.81818	0.00902344	0.0150391	0.135352	368.8	291.6
k__Bacteria;p__Bacteroidetes;c__Bacteroidia;o__Bacteroidales;f__[Paraprevotellaceae];g__YRC22	6.81818	0.00902344	0.0150391	0.135352	298.8	204.2
k__Bacteria;p__Cyanobacteria;c__4C0d-2;o__YS2;f__;g__	6.81818	0.00902344	0.0150391	0.135352	648.2	504.6
k__Bacteria;p__Firmicutes;c__Clostridia;o__Clostridiales;f__Lachnospiraceae;g__	6.81818	0.00902344	0.0150391	0.135352	489.4	581.2
k__Bacteria;p__Firmicutes;c__Clostridia;o__Clostridiales;f__Ruminococcaceae;g__	6.81818	0.00902344	0.0150391	0.135352	1250.8	1510.2
k__Bacteria;p__Firmicutes;c__Clostridia;o__Clostridiales;f__Ruminococcaceae;g__Ruminococcus	6.81818	0.00902344	0.0150391	0.135352	577.2	670.8
k__Bacteria;p__Proteobacteria;c__Alphaproteobacteria;o__RF32;f__;g__	6.81818	0.00902344	0.0150391	0.135352	252.6	198.4
k__Bacteria;p__Tenericutes;c__Mollicutes;o__Anaeroplasmatales;f__Anaeroplasmataceae;g__Anaeroplasma	6.81818	0.00902344	0.0150391	0.135352	609.6	423.2
k__Bacteria;p__Proteobacteria;c__Epsilonproteobacteria;o__Campylobacterales;f__Campylobacteraceae;g__Campylobacter	5.77091	0.0162936	0.0244404	0.244404	339	258.2
k__Bacteria;p__Firmicutes;c__Clostridia;o__Clostridiales;f__;g__	4.39024	0.0361451	0.0492888	0.542177	3806	4129.6
k__Bacteria;p__Bacteroidetes;c__Bacteroidia;o__Bacteroidales;f__Prevotellaceae;g__Prevotella	3.15273	0.0758002	0.0947502	1	1296.6	1401
k__Bacteria;p__Bacteroidetes;c__Bacteroidia;o__Bacteroidales;f__Bacteroidaceae;g__Bacteroides	2.45455	0.117185	0.125555	1	416.4	469.8
k__Bacteria;p__Firmicutes;c__Clostridia;o__Clostridiales;f__Ruminococcaceae;g__Oscillospira	2.45455	0.117185	0.125555	1	489.8	424
k__Bacteria;p__Bacteroidetes;c__Bacteroidia;o__Bacteroidales;f__S24-7;g__	0.272727	0.601508	0.601508	1	3114.8	3054.6
Species
OTU	Test-Statistic	P	FDR_P	Bonferroni_P	TAS_60_mean	DePCR_60_mean
Unassigned;Other;Other;Other;Other;Other;Other	6.85976	0.00881586	0.0191748	0.14987	364.2	288.6
k__Bacteria;p__Bacteroidetes;c__Bacteroidia;o__Bacteroidales;f__[Paraprevotellaceae];g__YRC22;s__	6.81818	0.00902344	0.0191748	0.153398	283.8	204
k__Bacteria;p__Cyanobacteria;c__4C0d-2;o__YS2;f__;g__;s__	6.81818	0.00902344	0.0191748	0.153398	639	501
k__Bacteria;p__Firmicutes;c__Clostridia;o__Clostridiales;f__Lachnospiraceae;g__;s__	6.81818	0.00902344	0.0191748	0.153398	493.6	599
k__Bacteria;p__Firmicutes;c__Clostridia;o__Clostridiales;f__Ruminococcaceae;g__;s__	6.81818	0.00902344	0.0191748	0.153398	1291.8	1518
k__Bacteria;p__Proteobacteria;c__Alphaproteobacteria;o__RF32;f__;g__;s__	6.81818	0.00902344	0.0191748	0.153398	272.8	203.8
k__Bacteria;p__Tenericutes;c__Mollicutes;o__Anaeroplasmatales;f__Anaeroplasmataceae;g__Anaeroplasma;s__	6.81818	0.00902344	0.0191748	0.153398	581	406.4
k__Bacteria;p__Tenericutes;c__Mollicutes;o__RF39;f__;g__;s__	6.81818	0.00902344	0.0191748	0.153398	110.8	289.4
k__Bacteria;p__Firmicutes;c__Clostridia;o__Clostridiales;f__;g__;s__	5.77091	0.0162936	0.0276991	0.276991	3758	4094
k__Bacteria;p__Firmicutes;c__Clostridia;o__Clostridiales;f__Ruminococcaceae;g__Ruminococcus;s__	5.77091	0.0162936	0.0276991	0.276991	375.6	445.8
k__Bacteria;p__Proteobacteria;c__Epsilonproteobacteria;o__Campylobacterales;f__Campylobacteraceae;g__Campylobacter;s__	4.81091	0.0282801	0.0437056	0.480762	339.2	259.4
k__Bacteria;p__Bacteroidetes;c__Bacteroidia;o__Bacteroidales;f__Bacteroidaceae;g__Bacteroides;s__	2.45455	0.117185	0.142296	1	397.2	454.2
k__Bacteria;p__Firmicutes;c__Clostridia;o__Clostridiales;f__Ruminococcaceae;g__Oscillospira;s__	2.45455	0.117185	0.142296	1	486.6	436
k__Bacteria;p__Firmicutes;c__Clostridia;o__Clostridiales;f__Ruminococcaceae;g__Ruminococcus;s__flavefaciens	2.45455	0.117185	0.142296	1	192.4	223
k__Bacteria;p__Bacteroidetes;c__Bacteroidia;o__Bacteroidales;f__Prevotellaceae;g__Prevotella;s__copri	1.32	0.250592	0.284004	1	707	743.6
k__Bacteria;p__Bacteroidetes;c__Bacteroidia;o__Bacteroidales;f__Prevotellaceae;g__Prevotella;s__	0.883636	0.347208	0.368908	1	635	665.2
k__Bacteria;p__Bacteroidetes;c__Bacteroidia;o__Bacteroidales;f__S24-7;g__;s__	0.0109091	0.916815	0.916815	1	3085	3060.8
